# Supplementary material for: Design, synthesis, and inhibitory activity of hydroquinone ester derivatives against mushroom tyrosinase
Source: Royal Society of Chemistry journal article supplement (doi:10.1039/d4ra00007b), 2024-01-01
Supplement: d4ra00007b1.pdf [file d4ra00007b1.pdf]

## Supporting Information

### Design, Synthesis, and Inhibitory Activity of Hydroquinone Ester

#### Derivatives against Mushroom Tyrosinase

Dong Xie<sup>a, #</sup>, Kangjia Han<sup>a, #</sup>, Qian Jiang<sup>a</sup>, Sida Xie<sup>a</sup>, Jielong Zhou<sup>a</sup>, Yingjun Zhang<sup>b</sup>, Junming Xu<sup>c</sup>, Yuanping He<sup>d</sup>, Ping Zhao<sup>e,\*</sup>, and Xiaoqin Yang<sup>a,\*</sup>

<sup>a</sup>Key Laboratory of National Forestry and Grassland Administration on Highly-Efficient Utilization of Forestry Biomass Resources in Southwest China, Southwest Forestry University, Kunming Yunnan 650224, PR China

<sup>b</sup>Laboratory of Phytochemistry and Plant Resources in West China, Kunming Institute of Botany, Chinese Academy of Sciences, Kunming Yunnan 650204, PR China

<sup>c</sup>Institute of Chemical Industry of Forest Products, Chinese Academy of Forestry, Nanjing Jiangsu 210042, PR China

<sup>d</sup>Kunming Beiye Dai Medicine Research Institute, Kunming Yunnan 650499, PR China

<sup>e</sup>Key Laboratory of Ministry of Education for Forest Resources Conservation and Utilization in the Southwest Mountains of China, Southwest Forestry University, Kunming Yunnan 650224, PR China

<sup>#</sup>Co-first authors. These authors contributed equally to this work.

\*Corresponding Authors.

hypzhao2022@163.com (P. Zhao)

yangxiaoqin@swfu.edu.cn (X.Q. Yang)

This file includes 7 Figures and 2 Tables

Contents of the Figures and the Tables

Figure S1.  $^1\text{H}$  NMR and  $^{13}\text{C}$  NMR for compound 3a-3g

Figure S2. HRMS for compound 3a-3g

Figure S3. The inhibitory activity of compound 3a-3g on mTyr

Figure S4. Inhibition reversibility (A) and inhibition type (B) of compound 3a, 3c-3e on mTyr.

Figure S5. UV Spectra of compound 3a, 3c-3e before and after interaction with mTyr

Figure S6. The crystal structure of mTyr (PDB ID: 2Y9X)

Figure S7. Docking model for compound 3a, 3c-3e with mTyr (A) and Molecular dynamics results of compound 3a, 3c-3e and (3a, 3c-3e) -mTyr complex with: B. RMSD, C. RMSF, D. Rg, E. SASA, and F. H-bonds

Table S1. Linear fitting equation, Michaelis constant ( $K_m$ ), maximum reaction rate ( $V_m$ ), and inhibition type for mTyr at varying concentrations of compounds 3a-3e

Table S2. Docking energy and bonding condition of compounds 3a-3e with mTyr





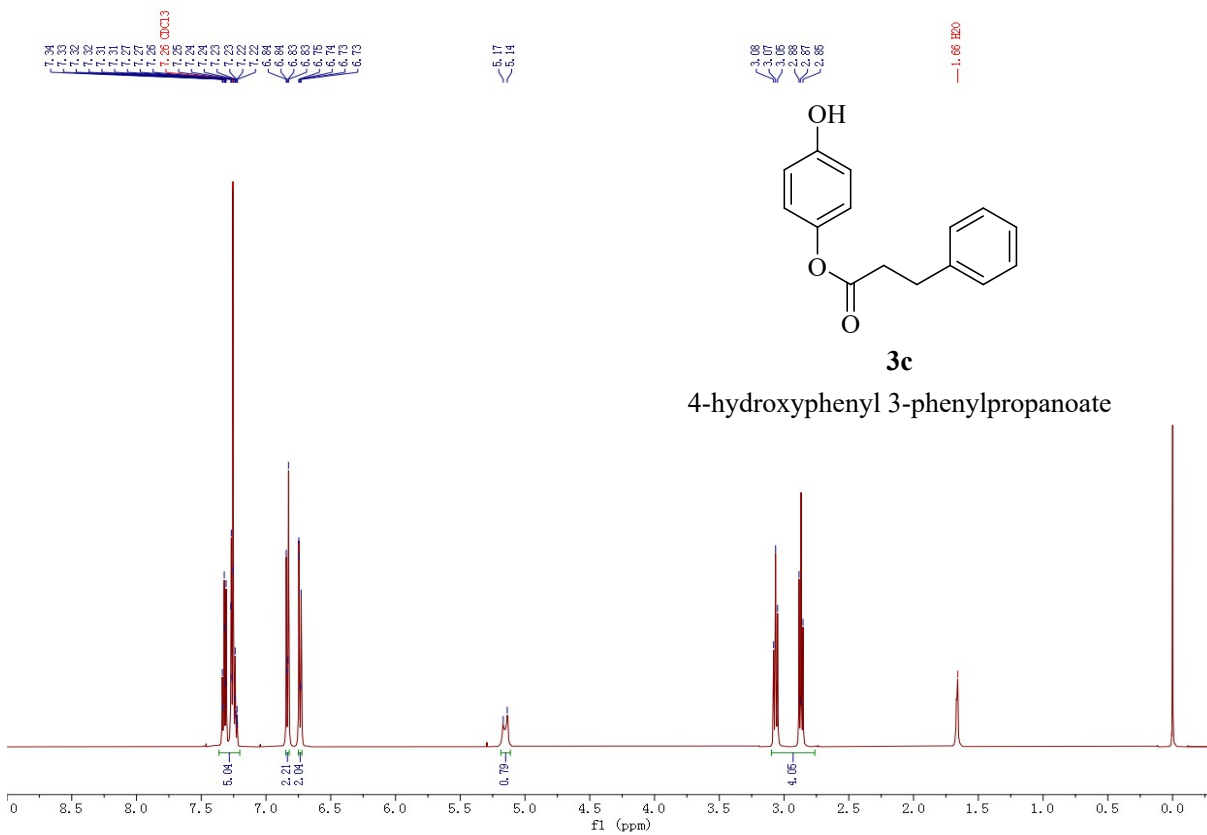

(5) <sup>1</sup>H NMR for compound 3c

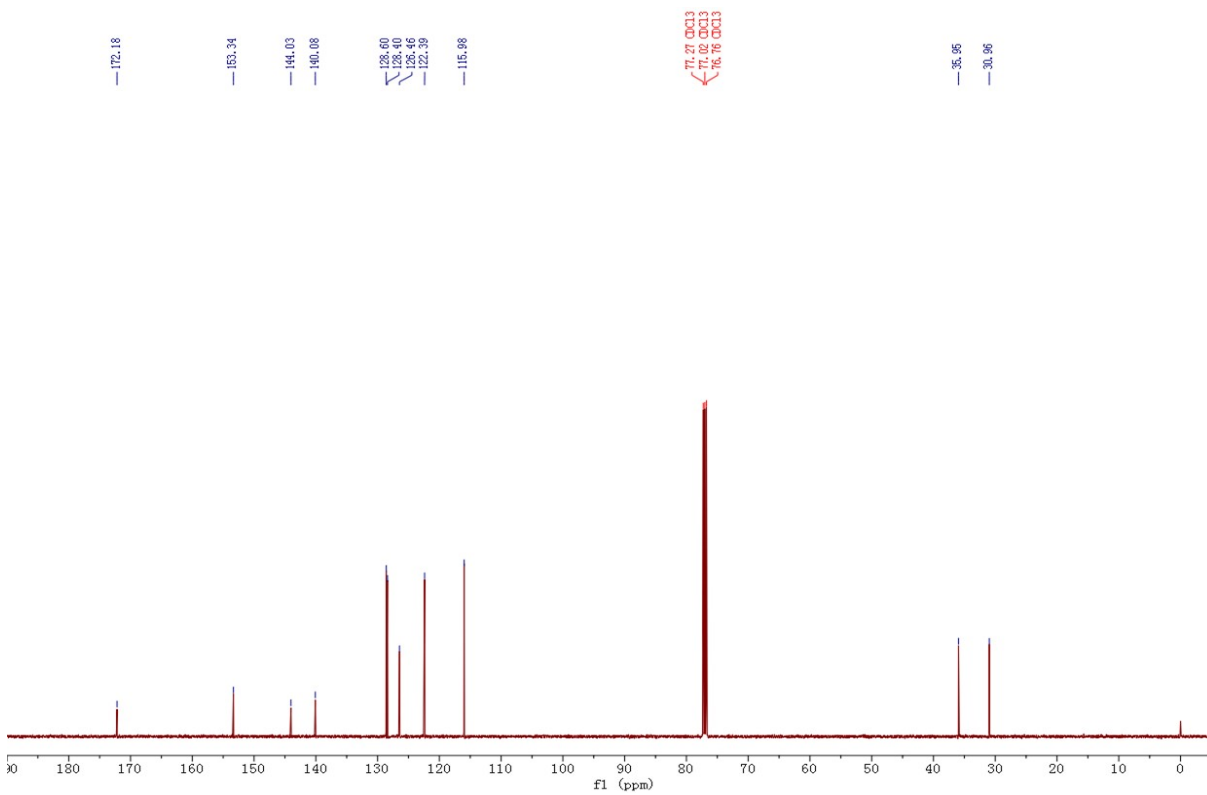

(6) <sup>13</sup>C NMR for compound 3c



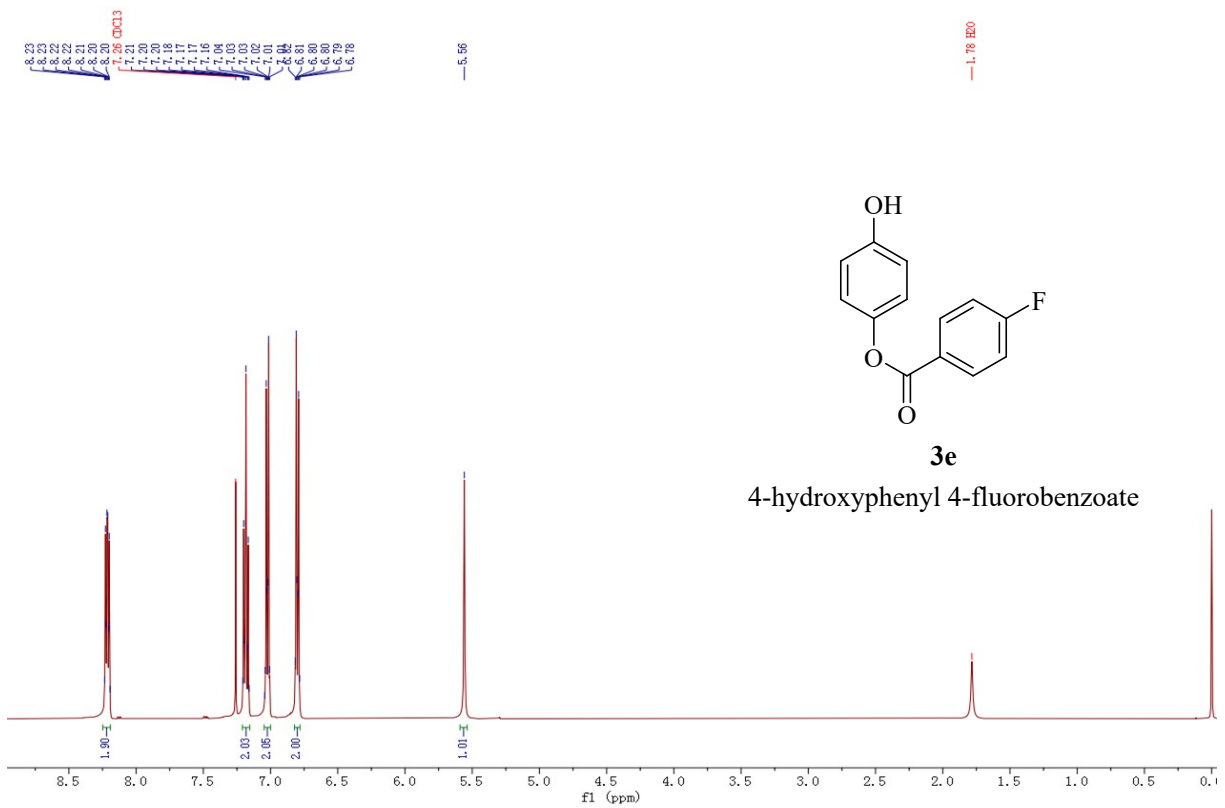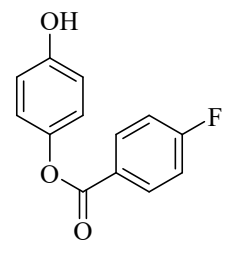

**3e**

4-hydroxyphenyl 4-fluorobenzoate

(9) <sup>1</sup>H NMR for compound 3e

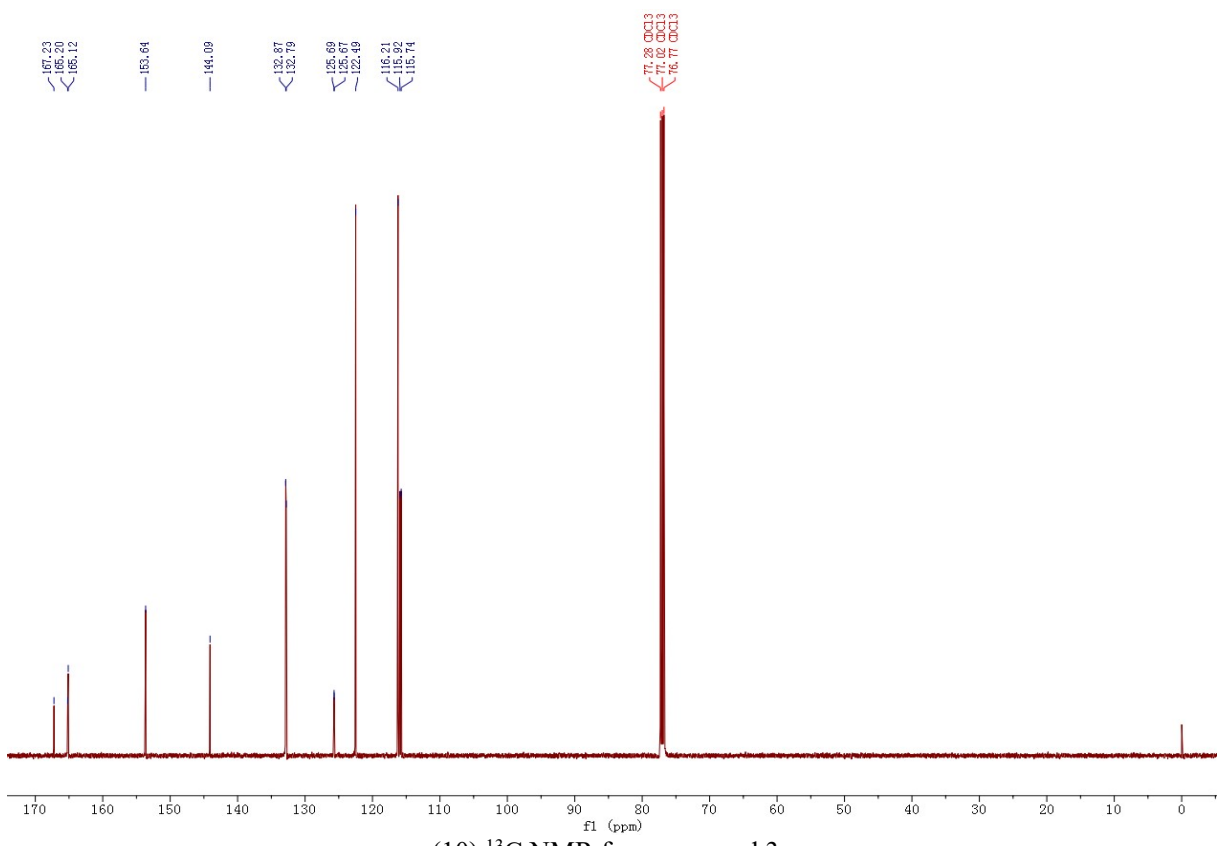

(10) <sup>13</sup>C NMR for compound 3e

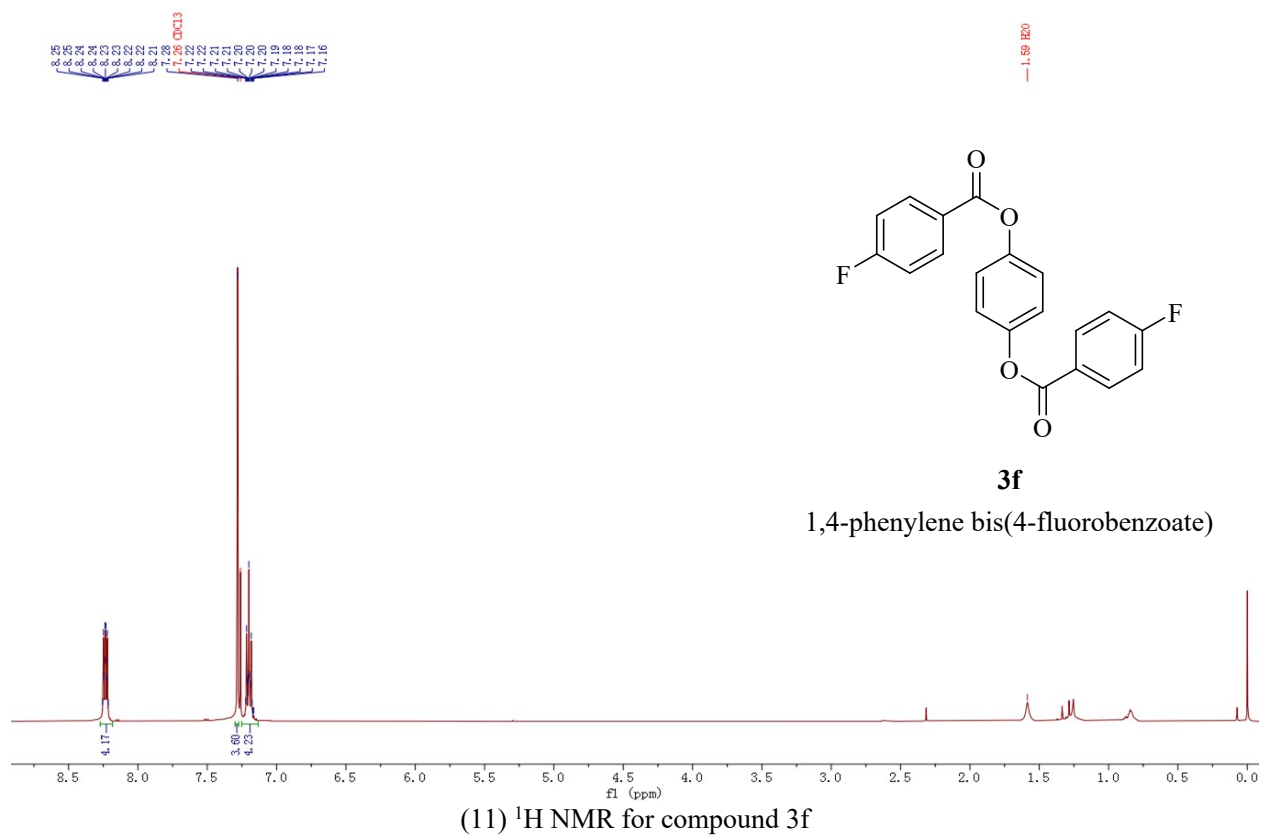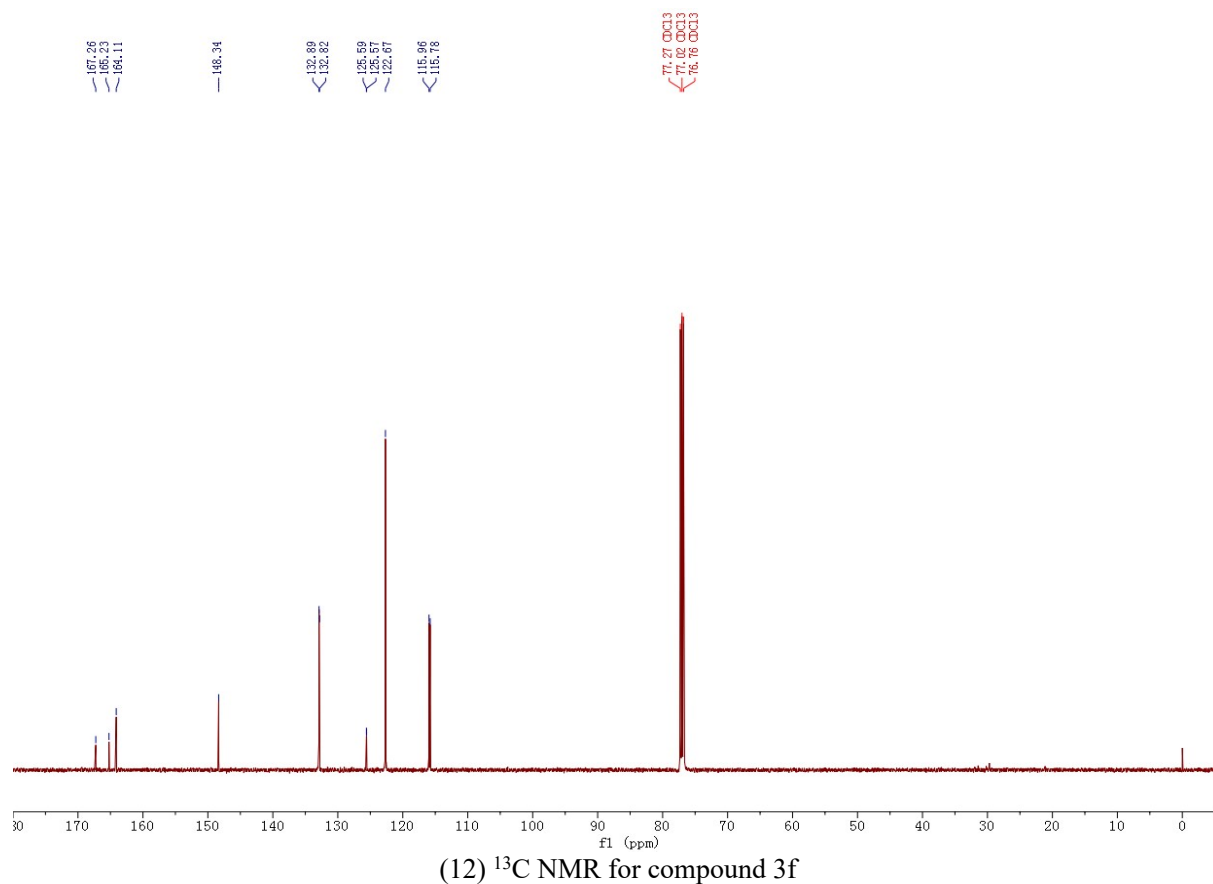



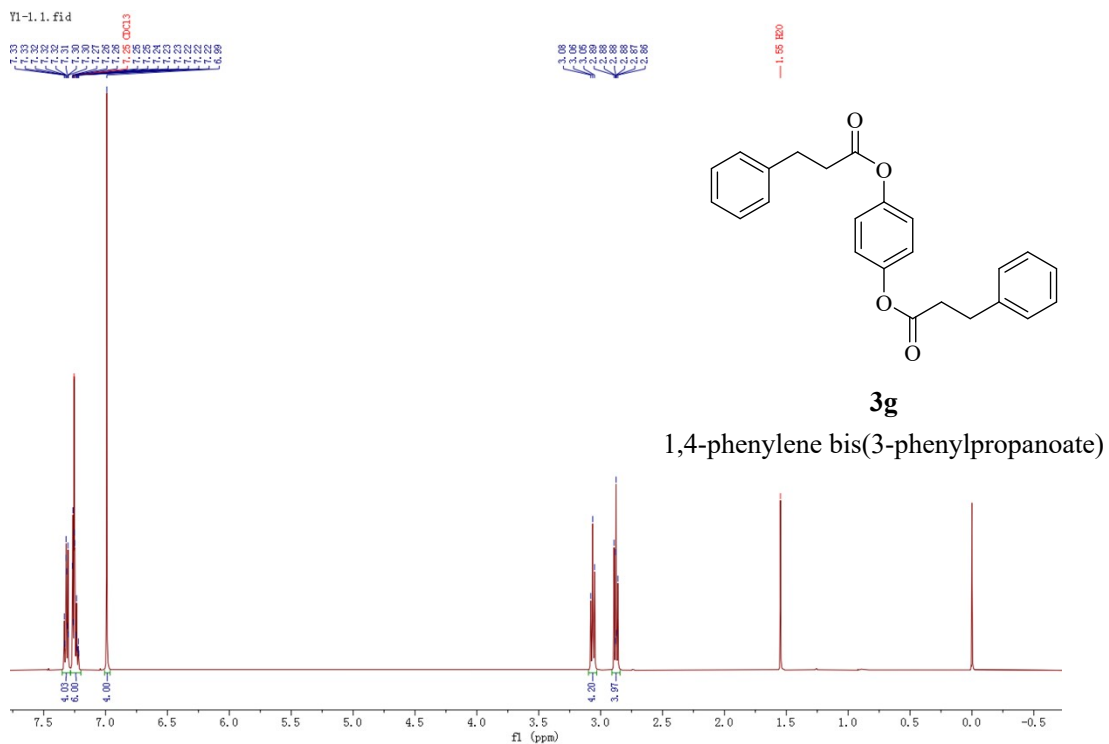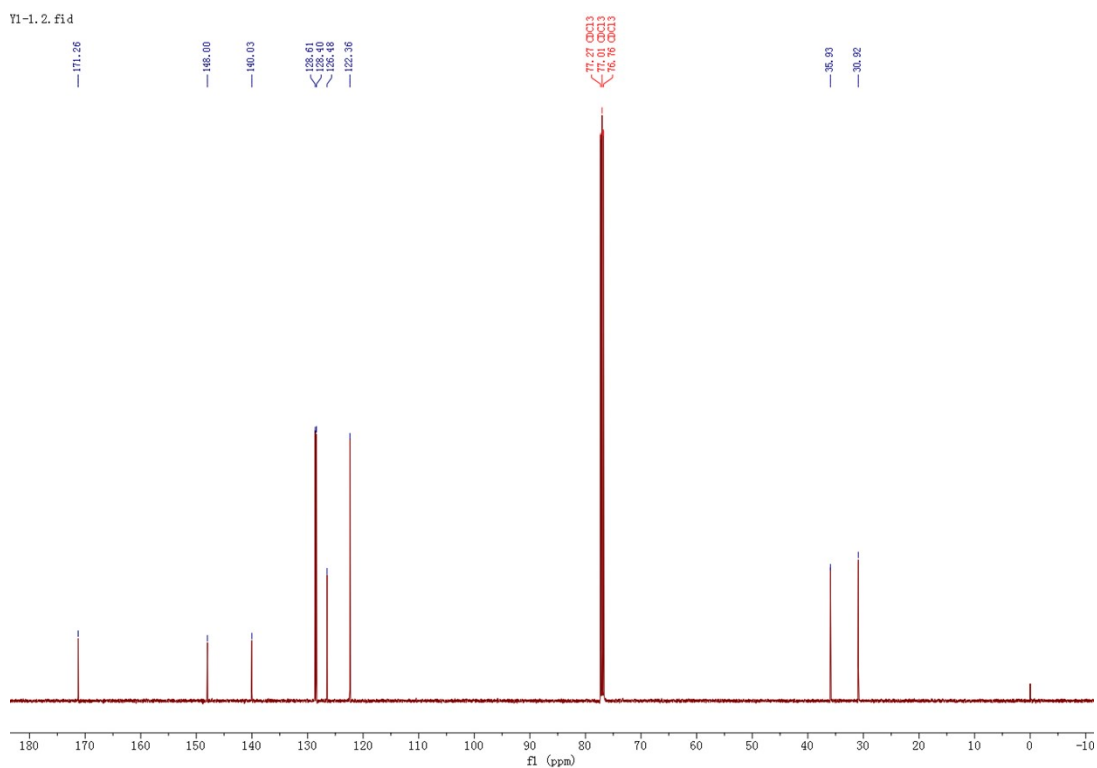

Figure S1. <sup>1</sup>H NMR and <sup>13</sup>C NMR for compound 3a-3g

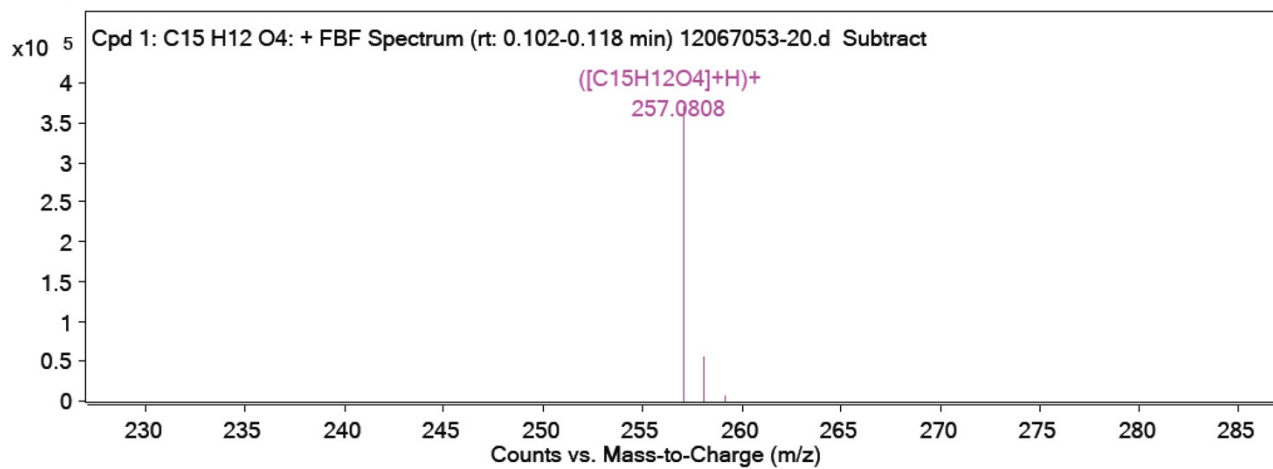

(1) HRMS for compound 3a

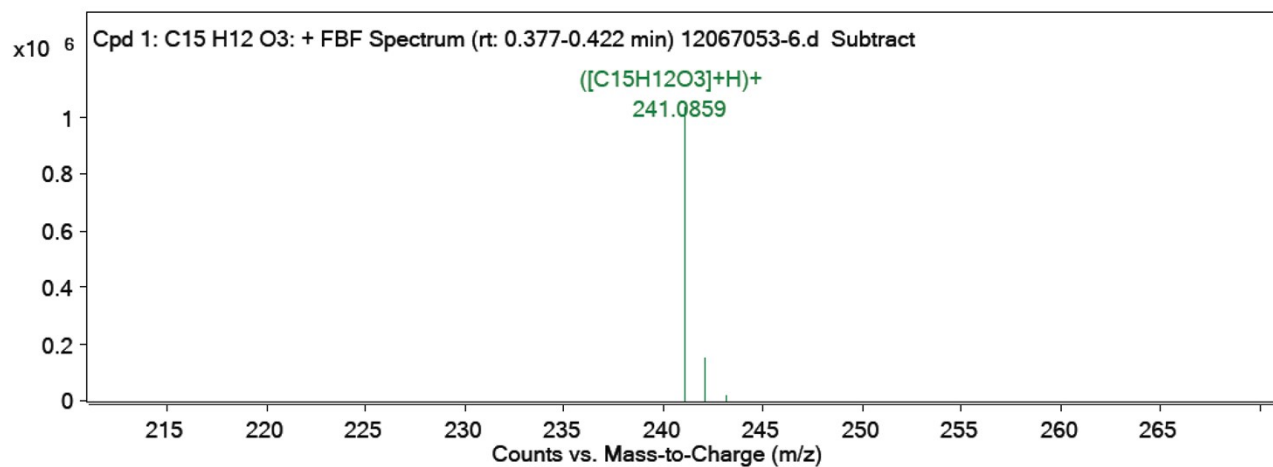

(2) HRMS for compound 3b

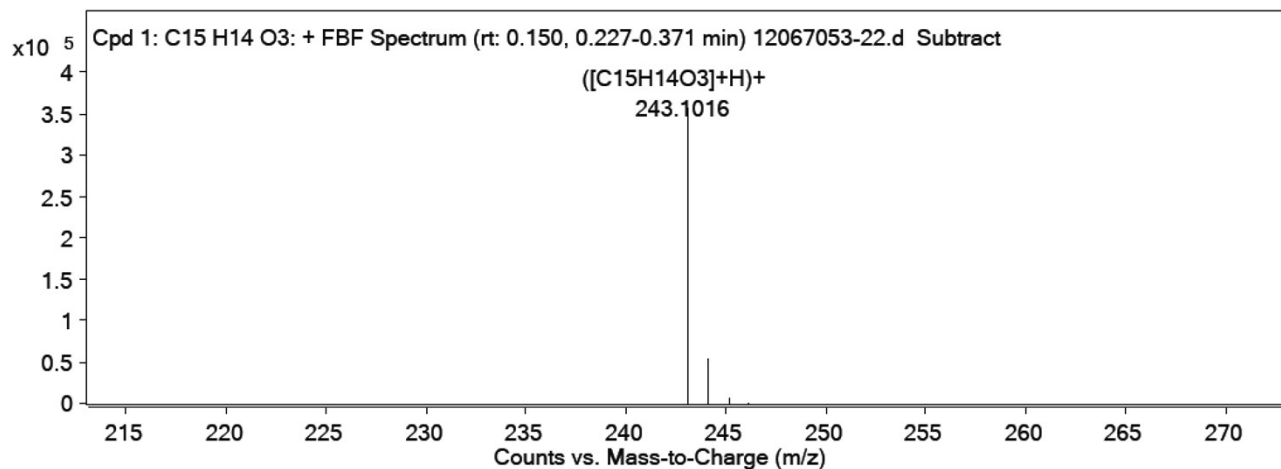

(3) HRMS for compound 3c

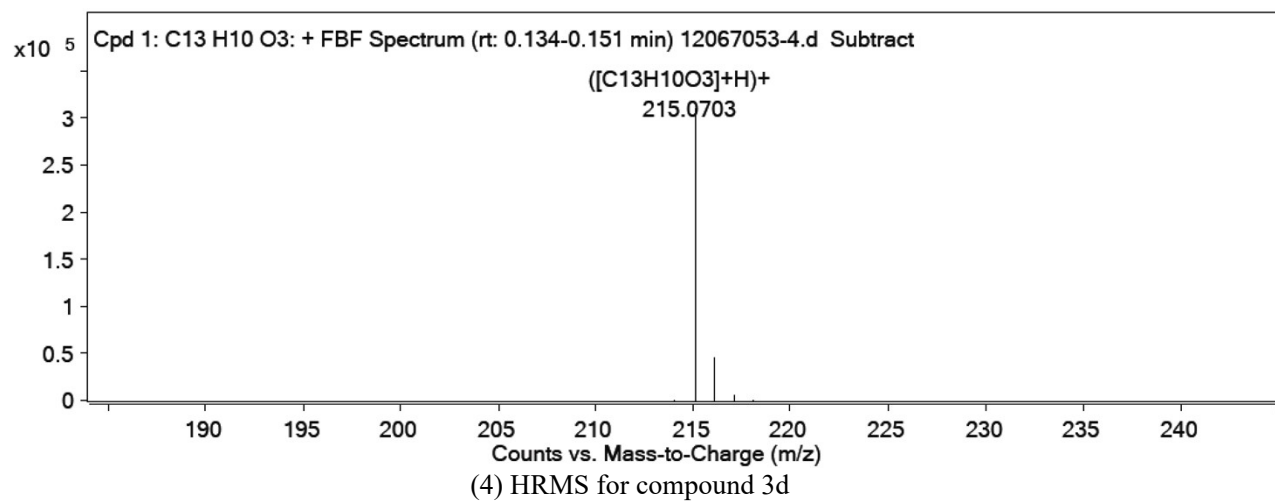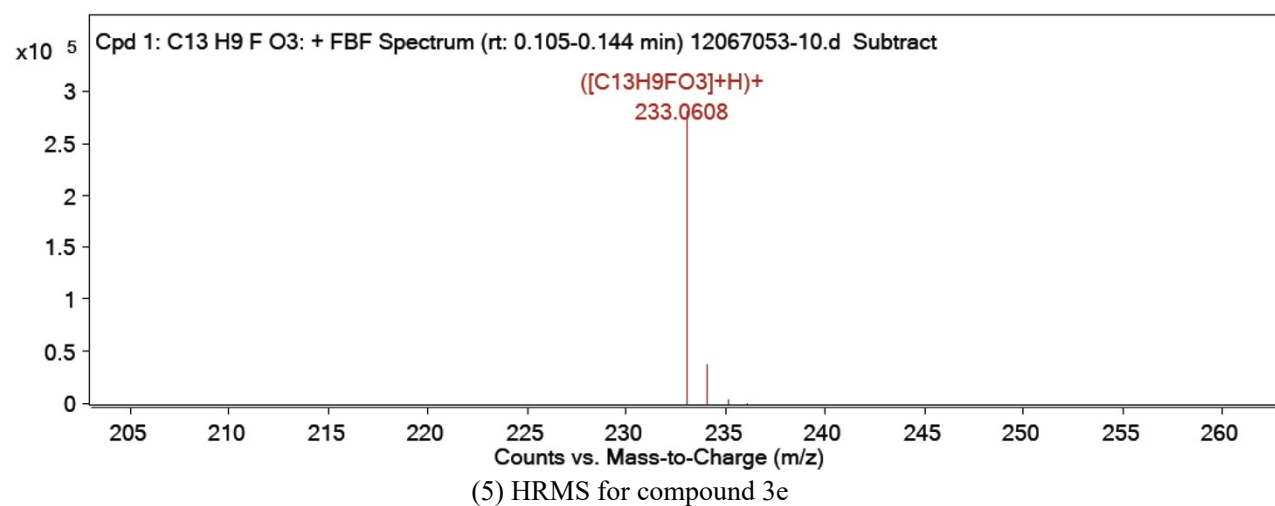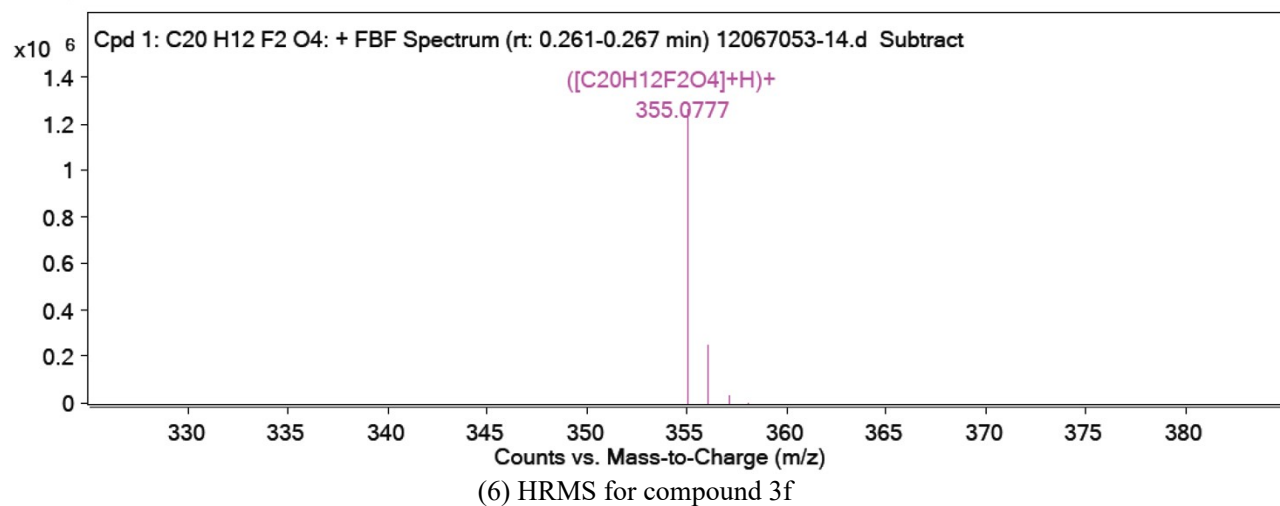

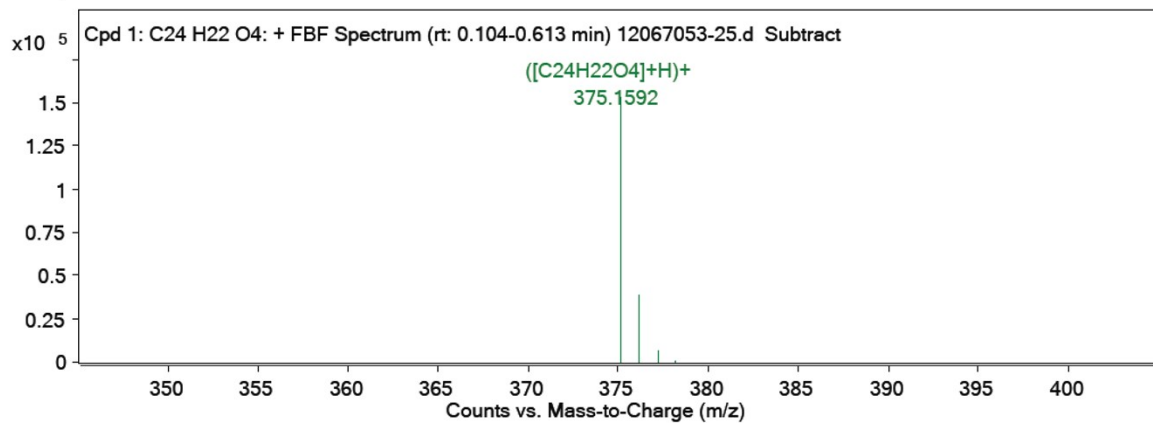

(7) HRMS for compound 3g

Figure S2. HRMS for compounds 3a-3g

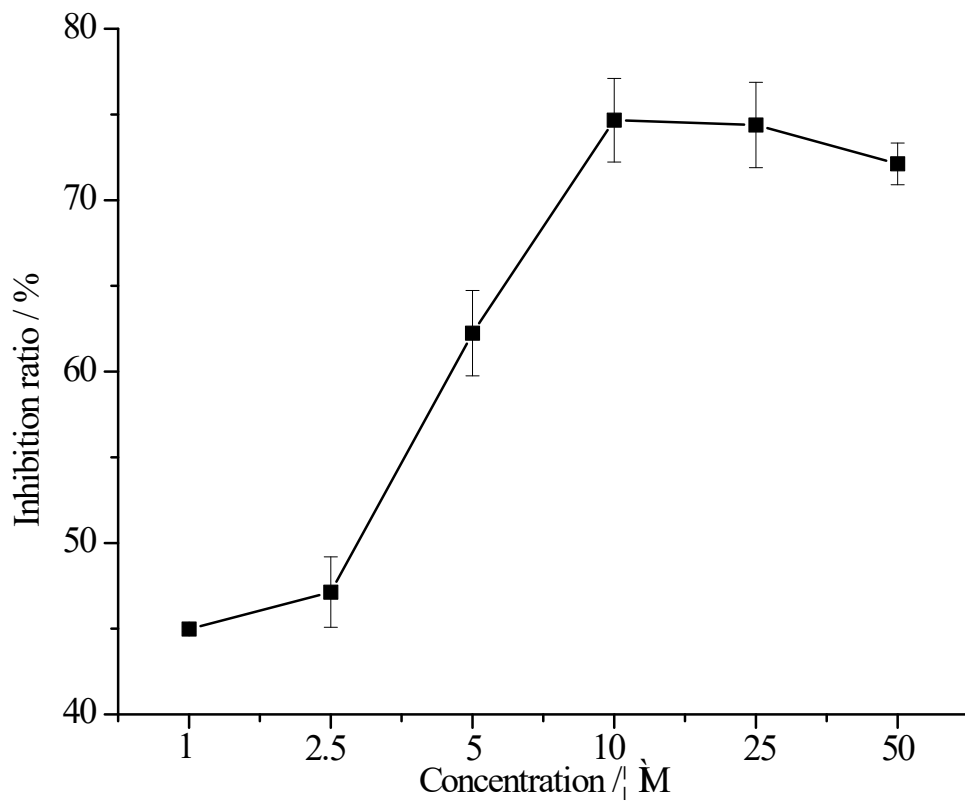

(1) The inhibitory activity of compound 3a on mTyr

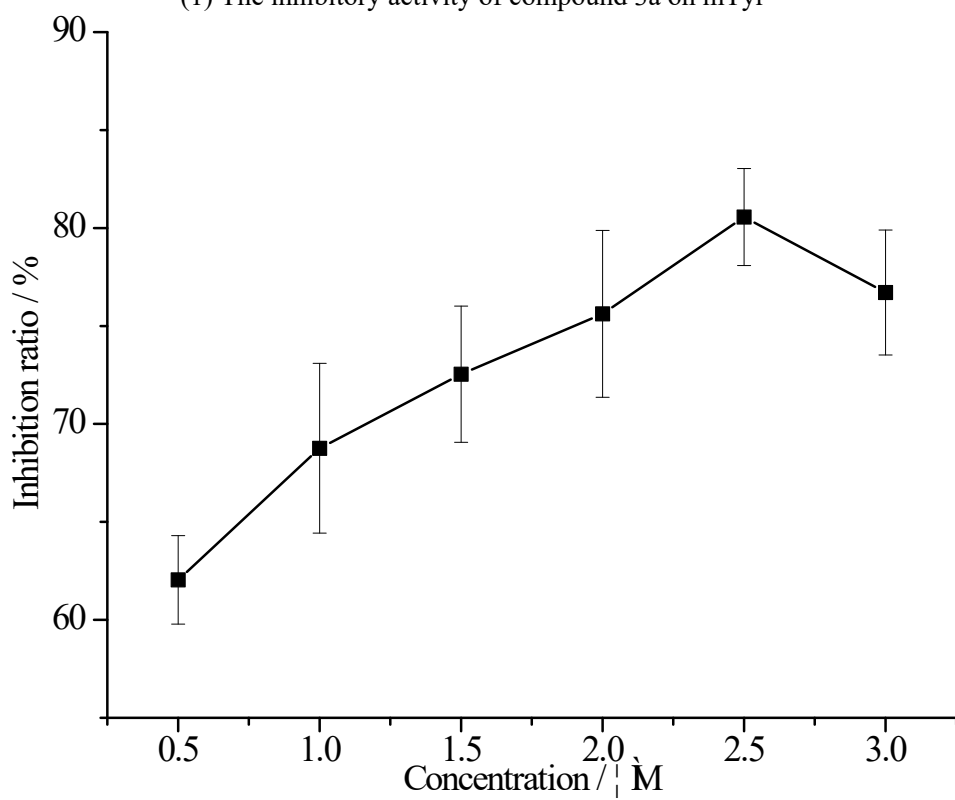

(2) The inhibitory activity of compound 3b on mTyr

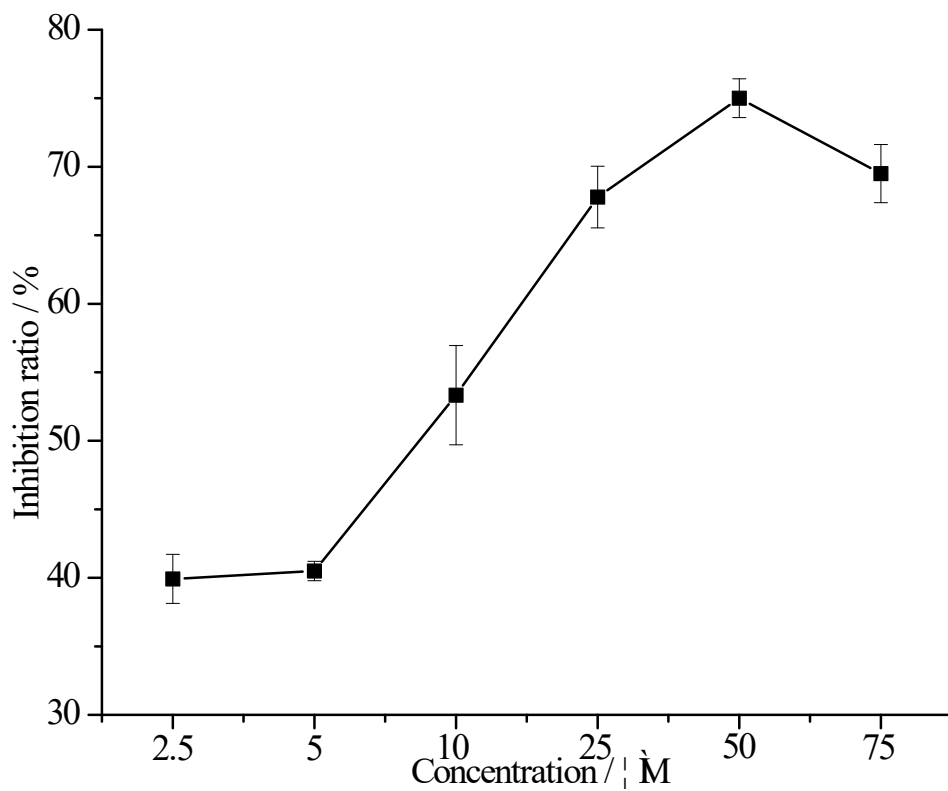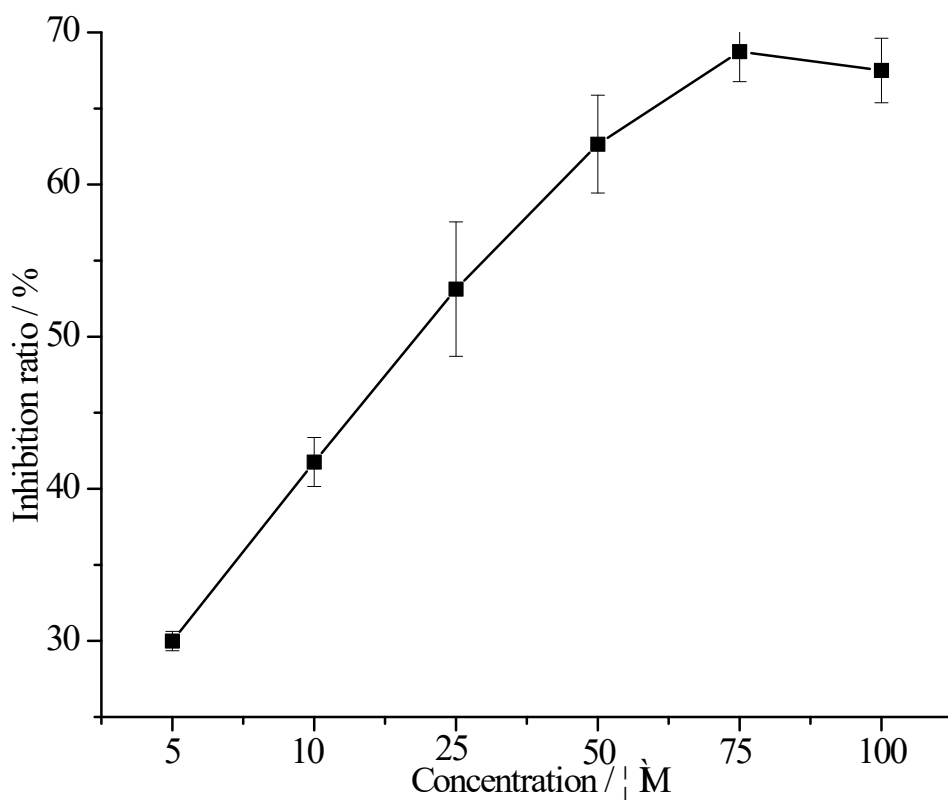

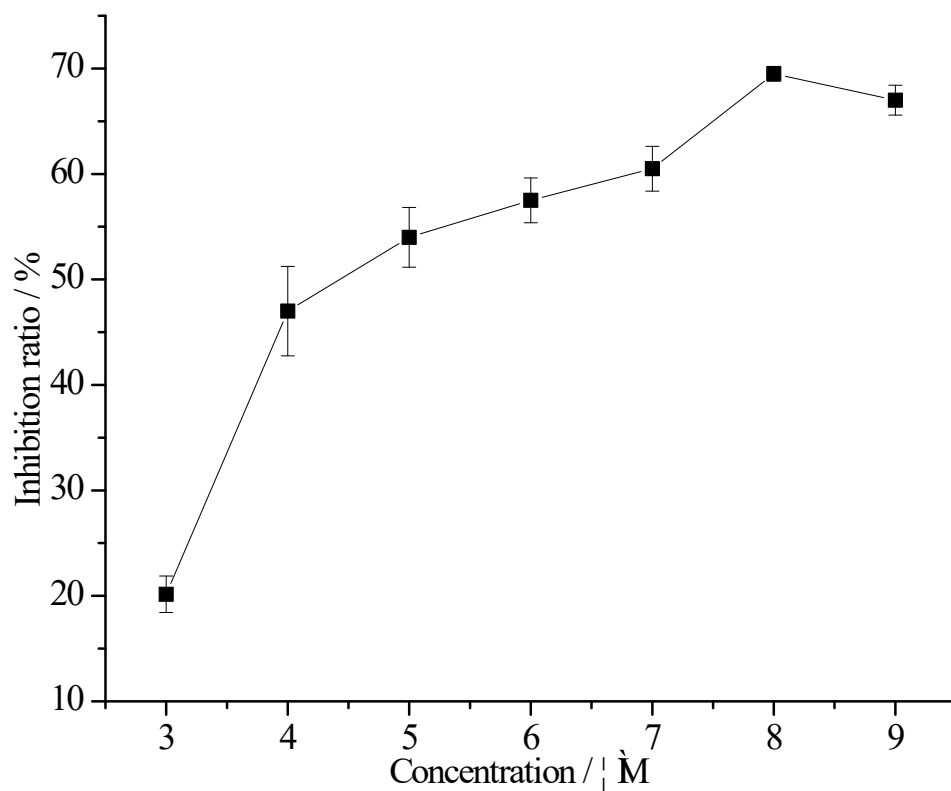

(5) The inhibitory activity of compound 3e on mTyr

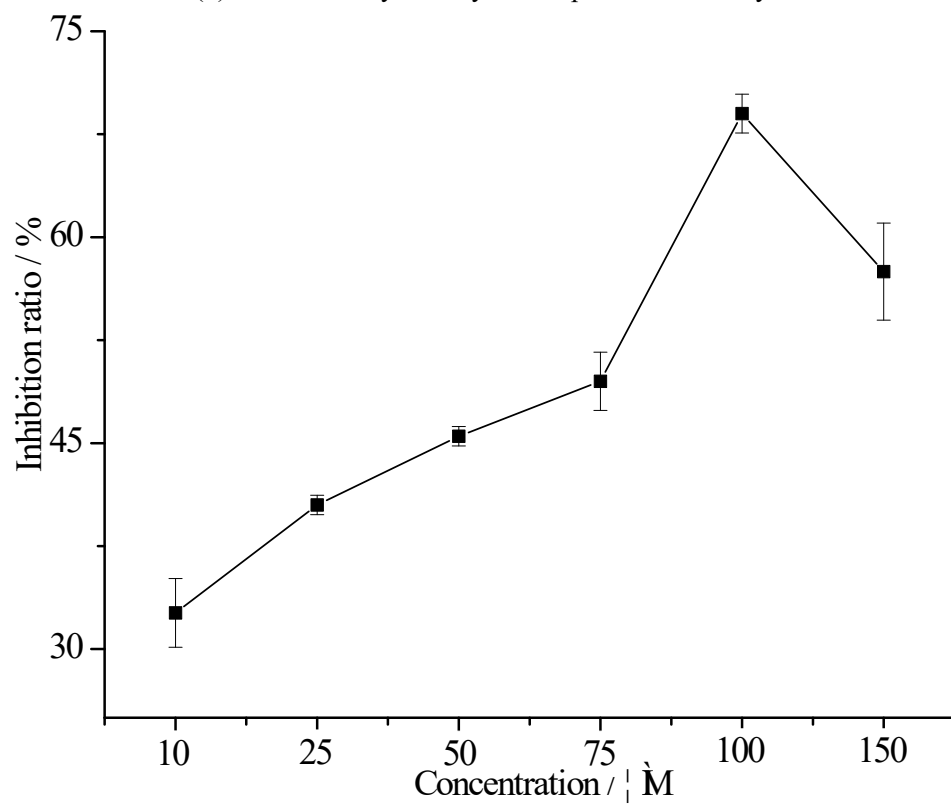

(6) The inhibitory activity of compound 3f on mTyr

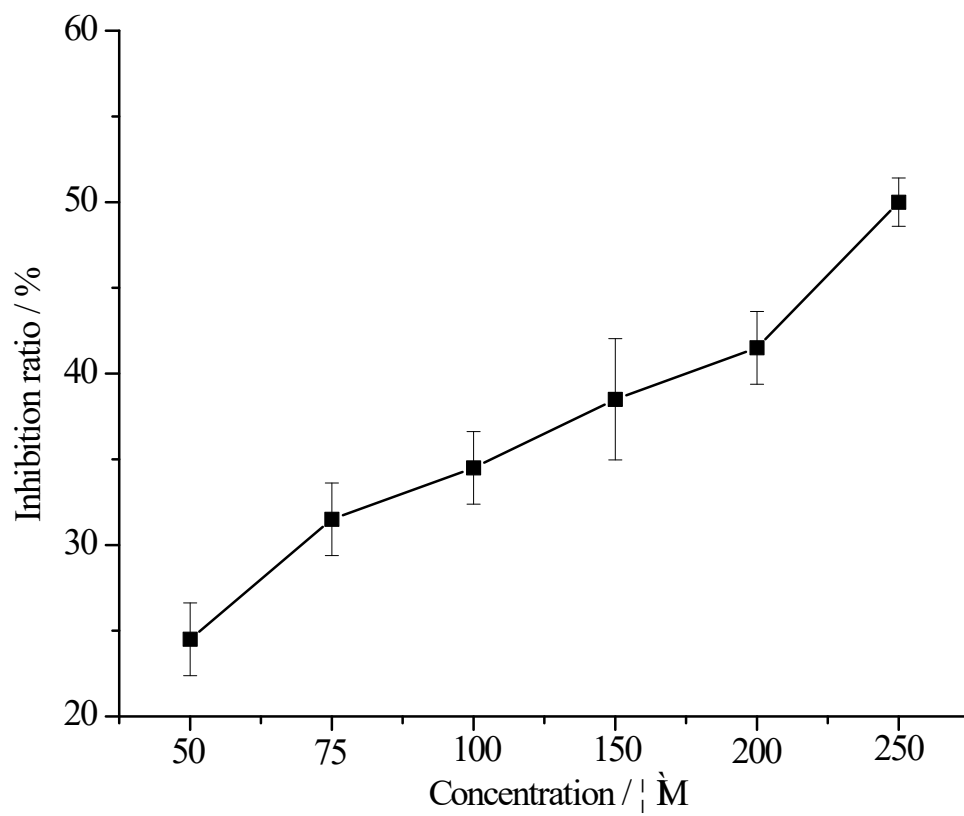

(7) The inhibitory activity of compound 3g on mTyr

Figure S3. The inhibitory activity of compounds 3a-3g on mTyr



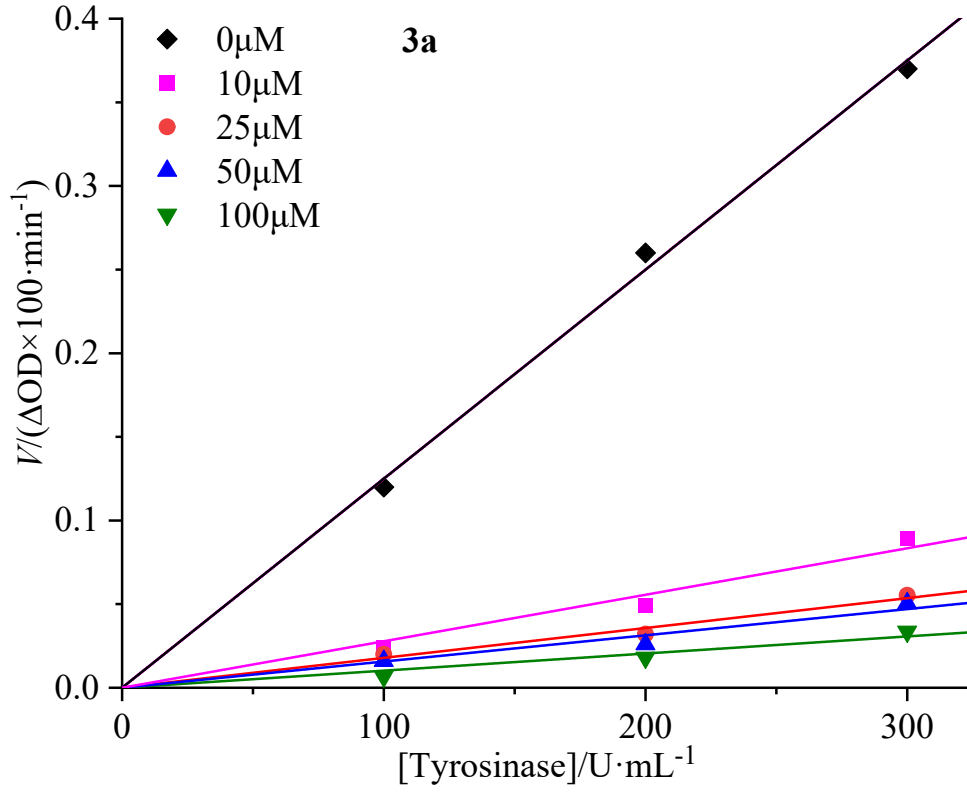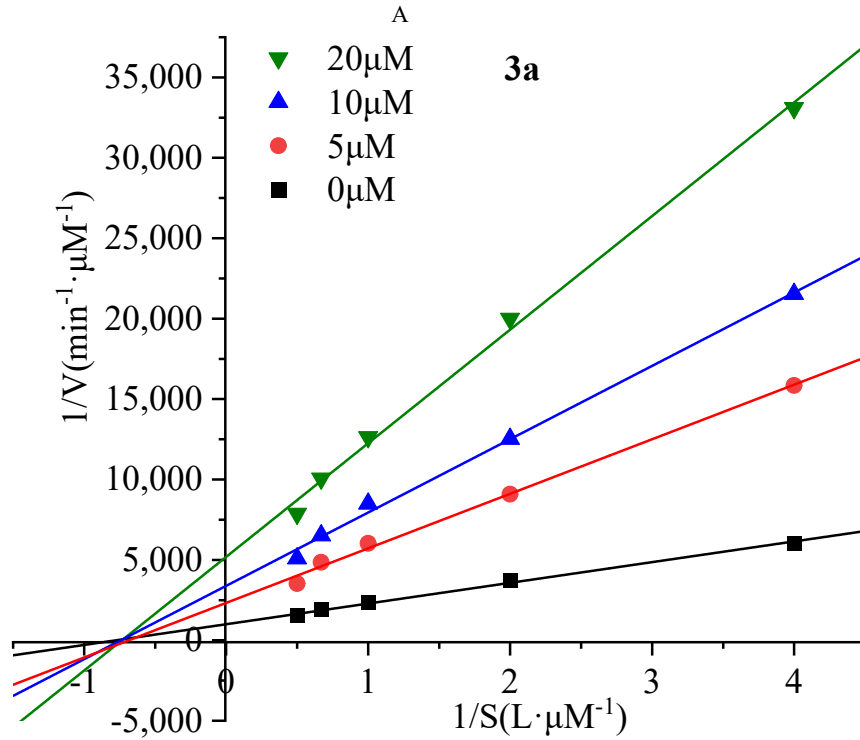

B  
(1) Compound 3a

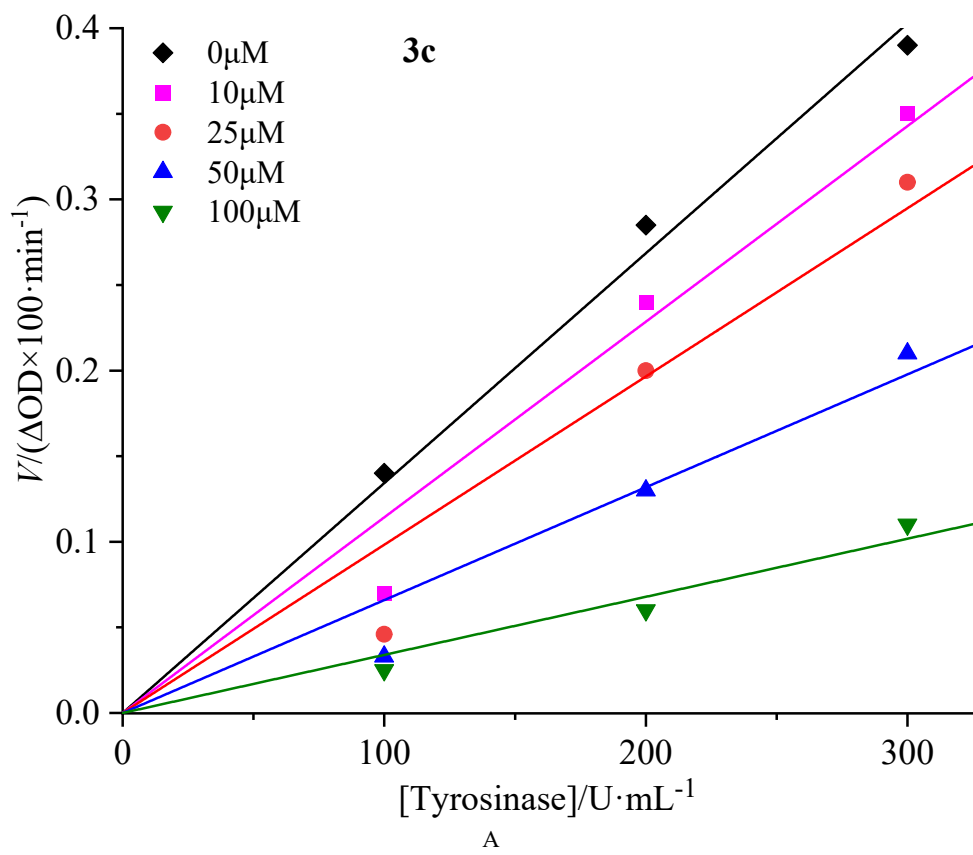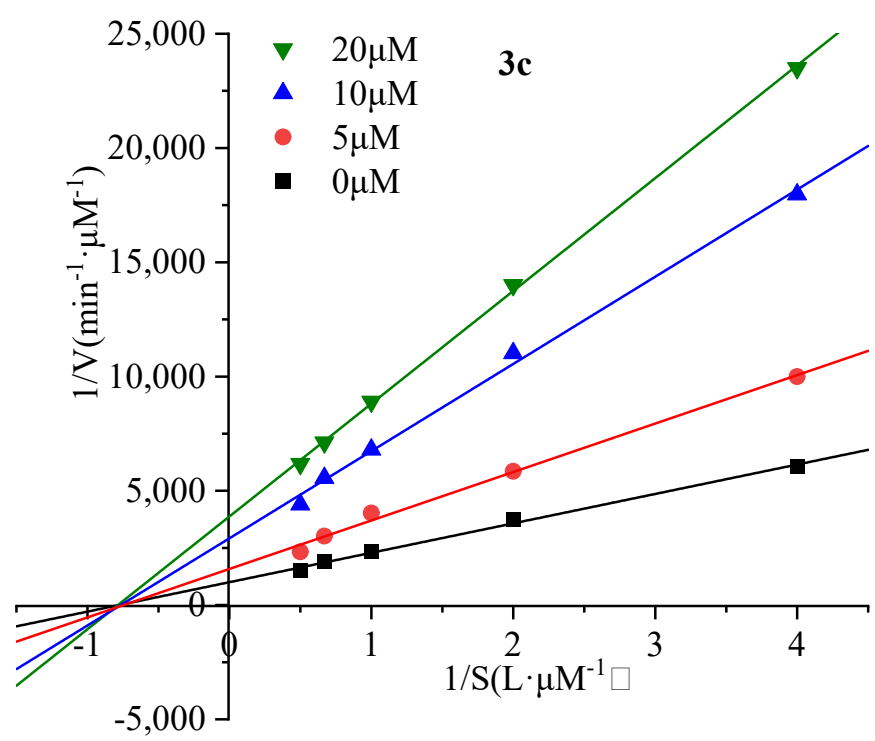

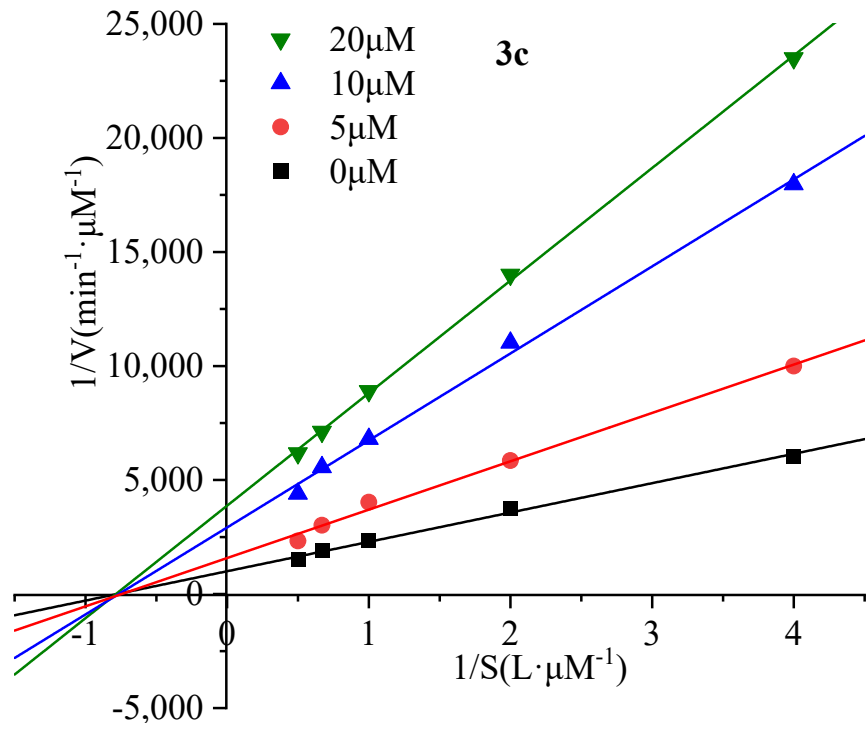

B

(2) Compound 3c

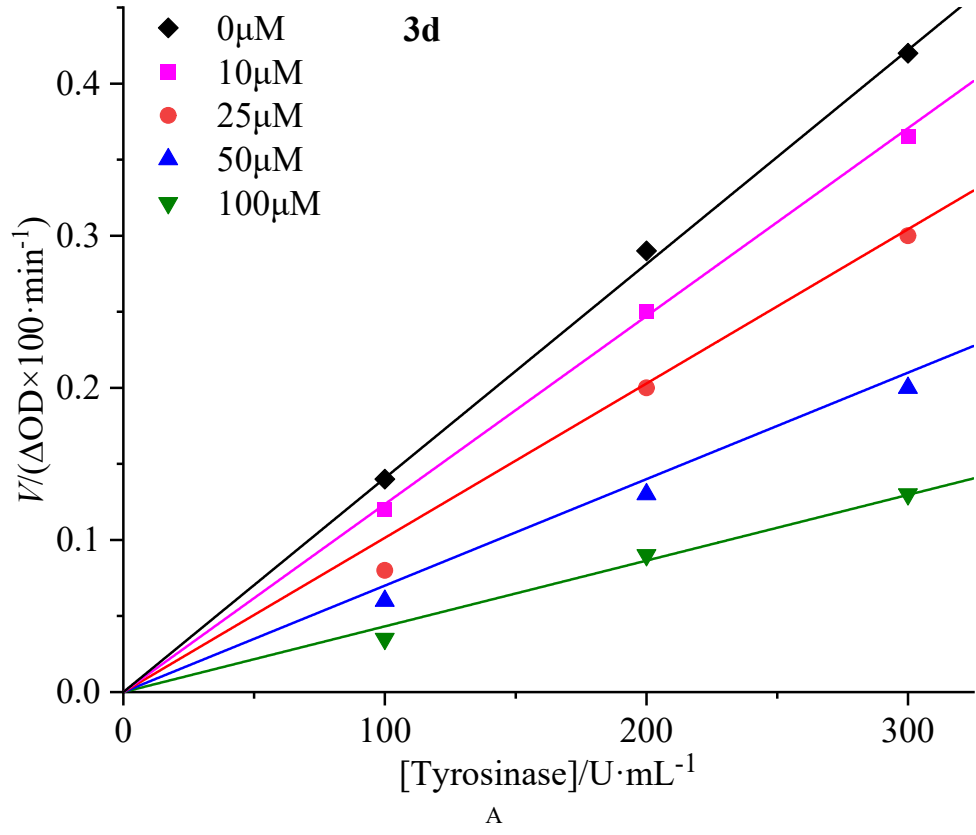

A

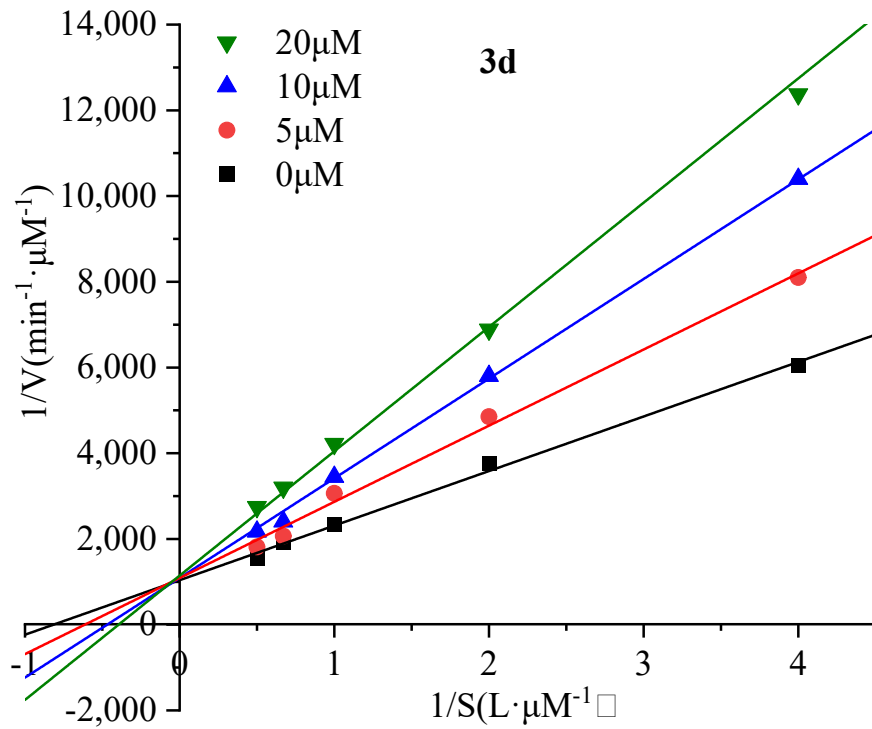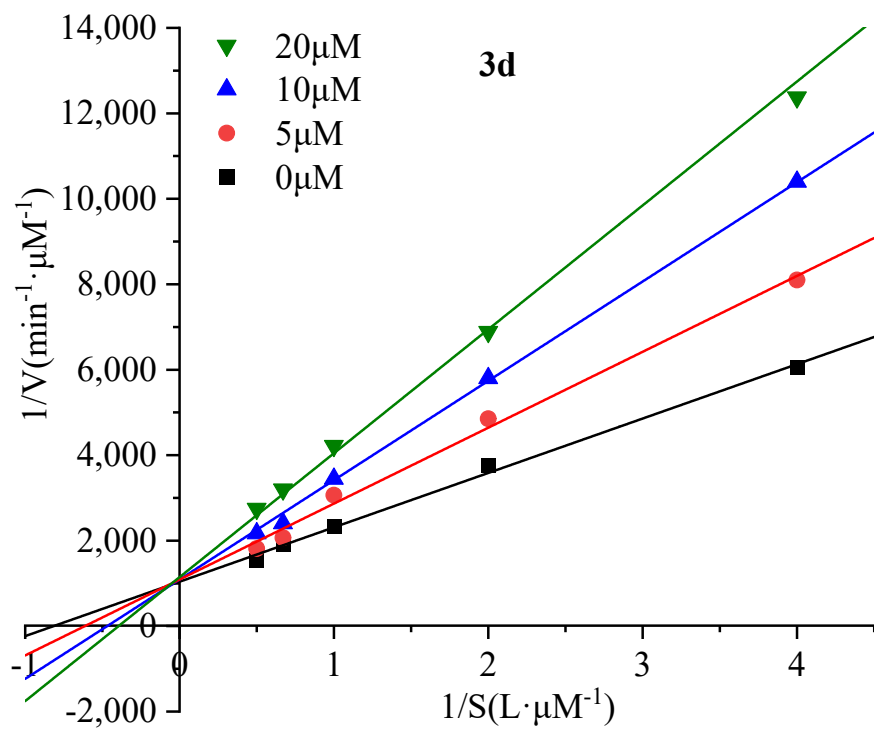

B  
(3) Compound 3d

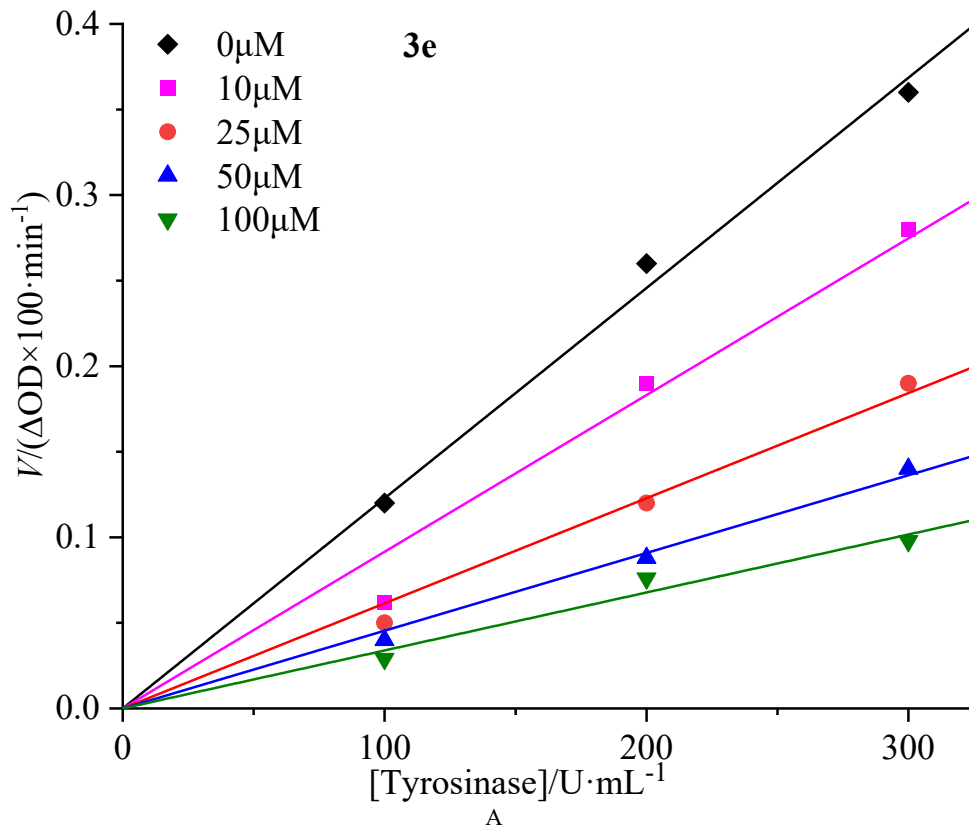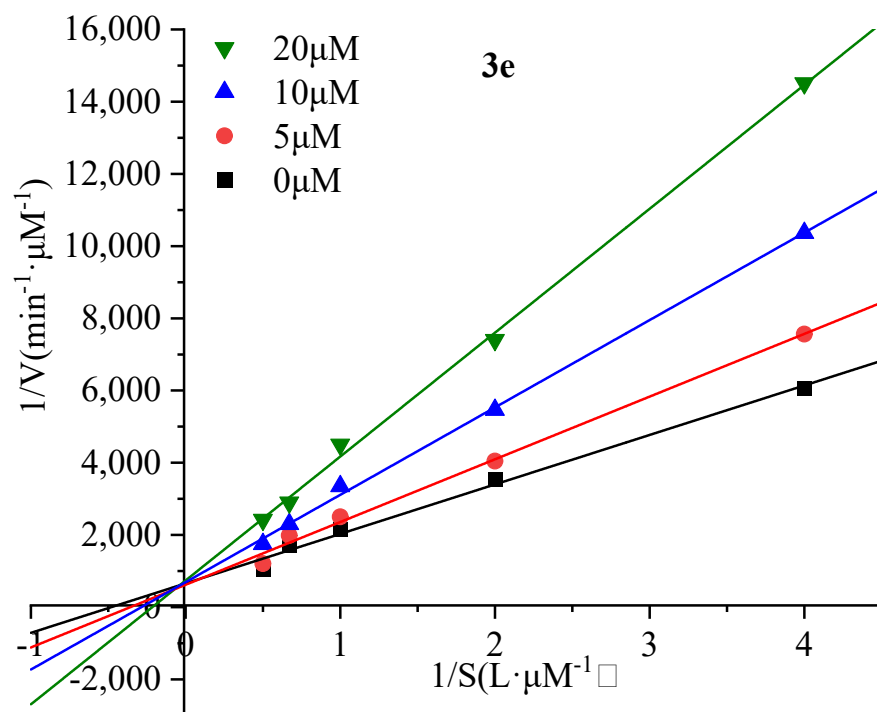

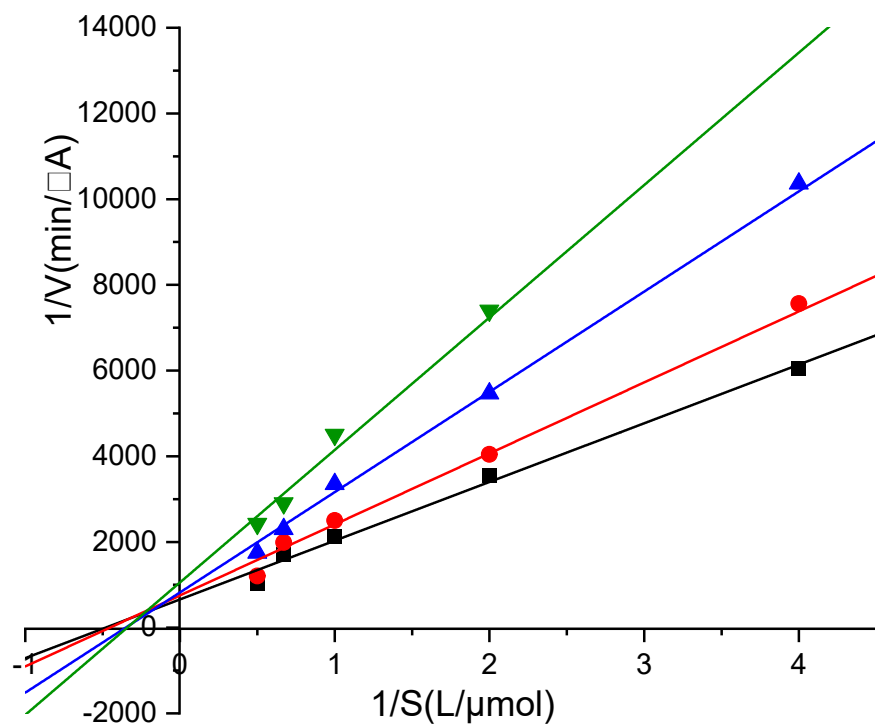

B  
(4) Compound 3e

Figure S4 Inhibition reversibility (A) and inhibition type (B) of compound 3a, 3c-3e on mTyr.

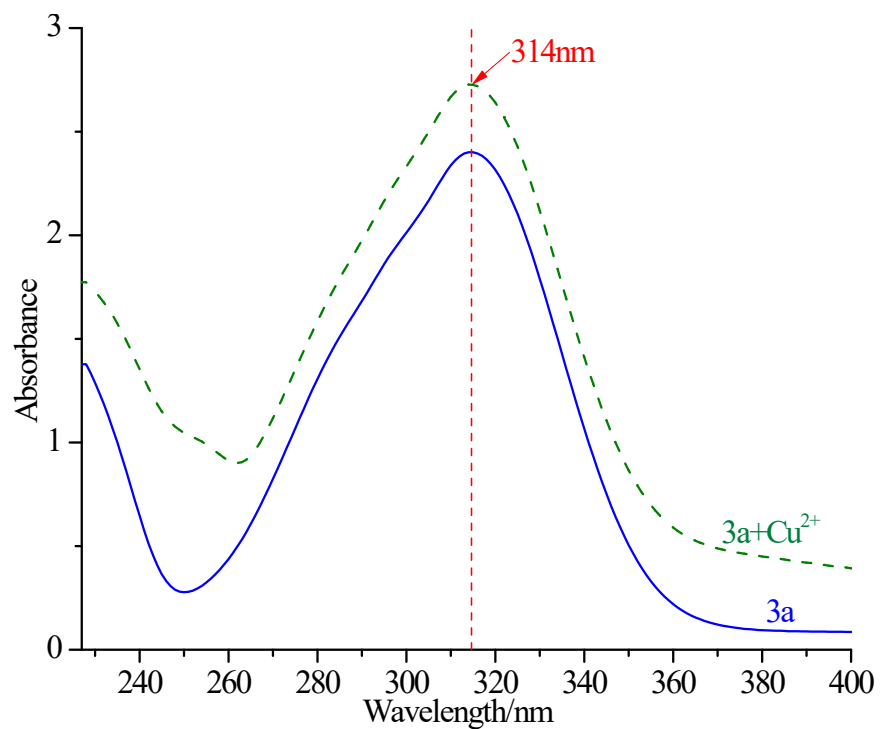

Compound 3a

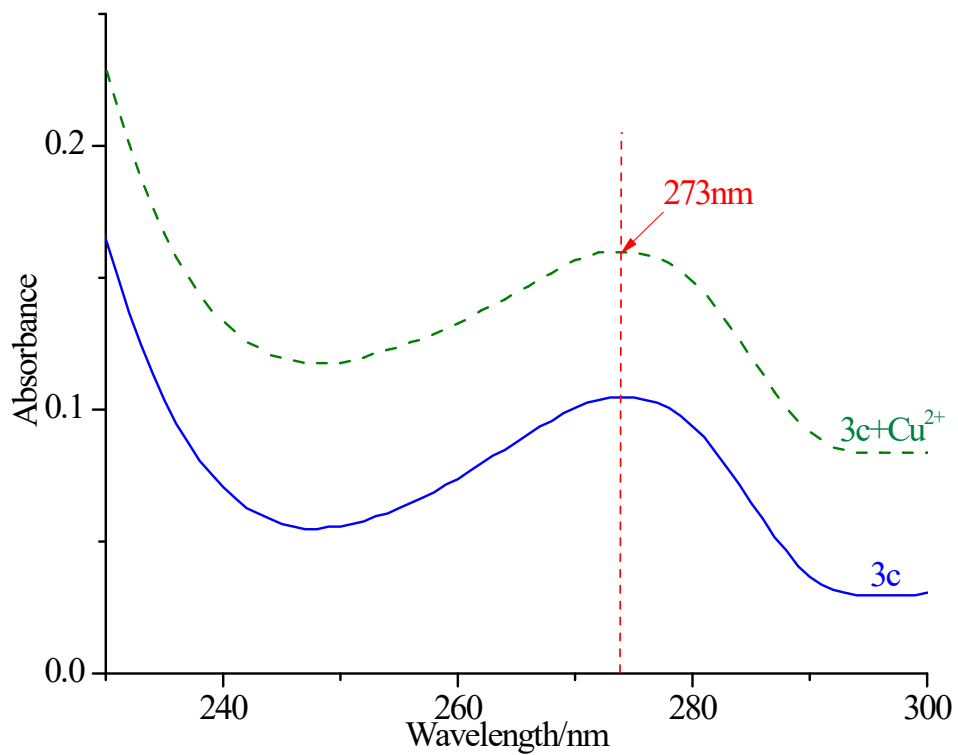

Compound 3c

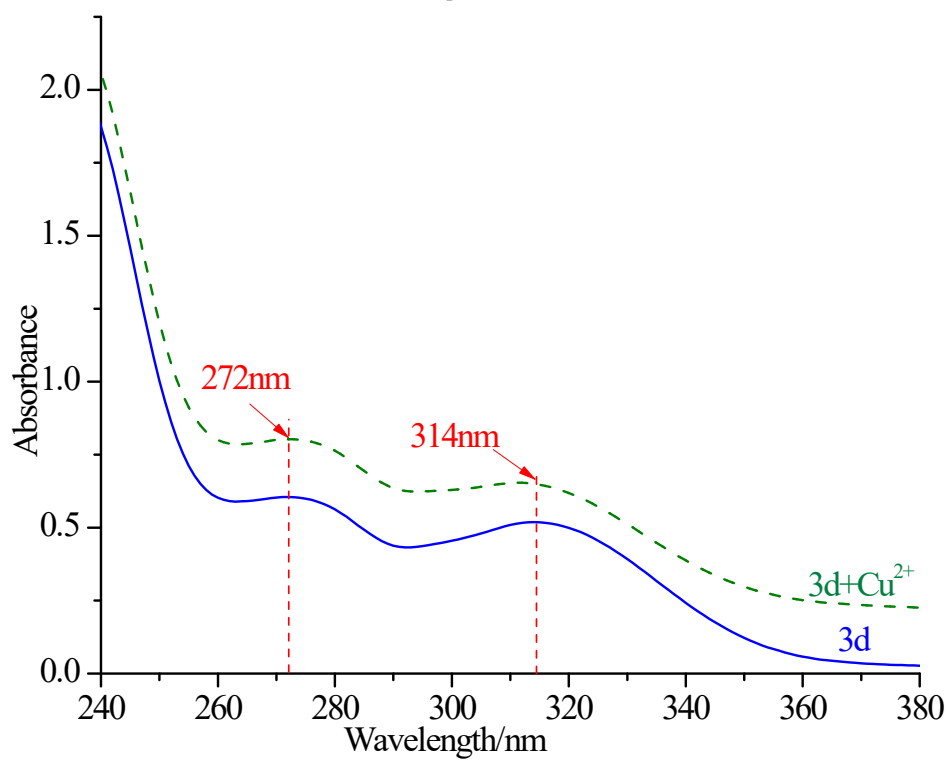

Compound 3d

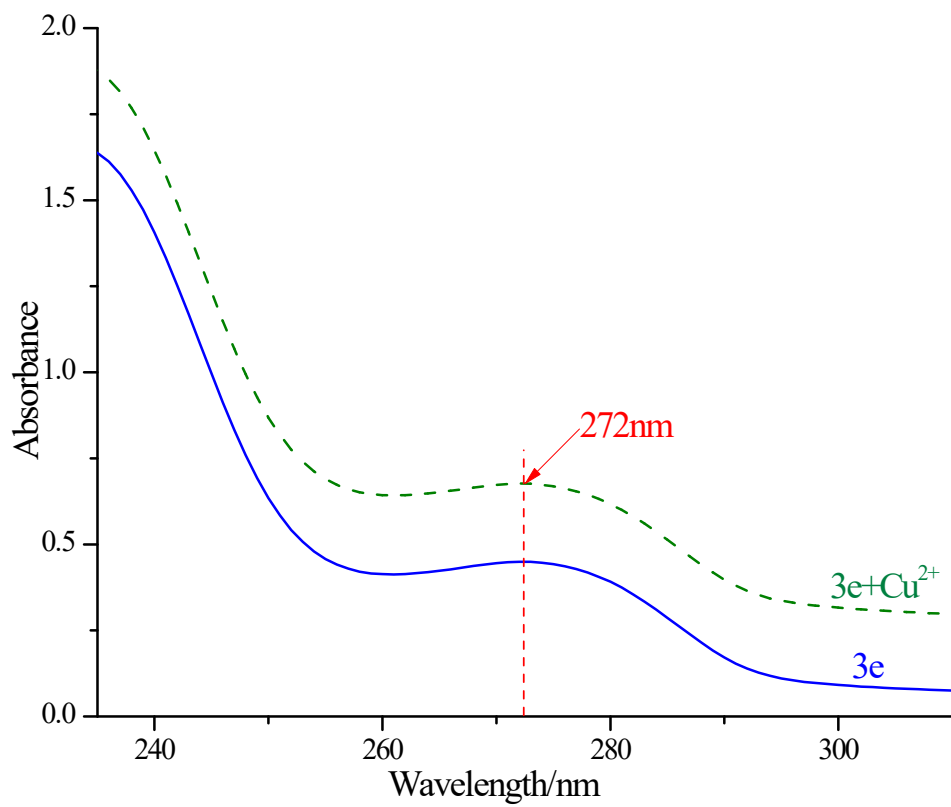

Compound 3e

Figure S5. UV Spectra of compound 3a, 3c-3e before and after interaction with mTyr



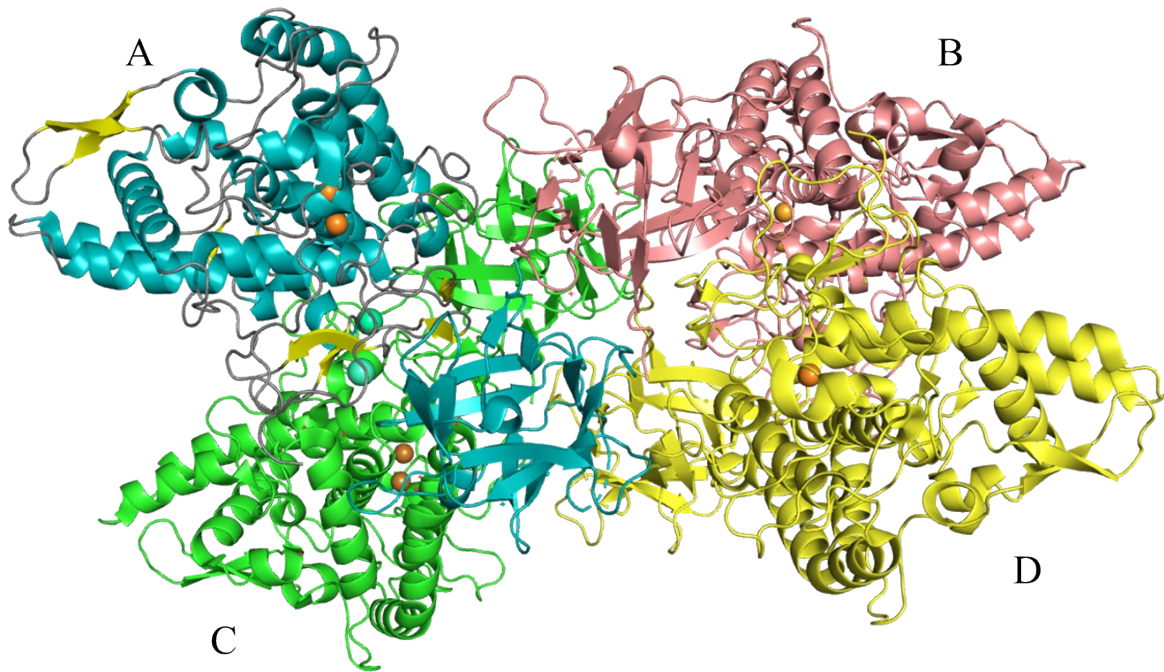

Figure S6. The crystal structure of mTyr (PDB ID: 2Y9X)

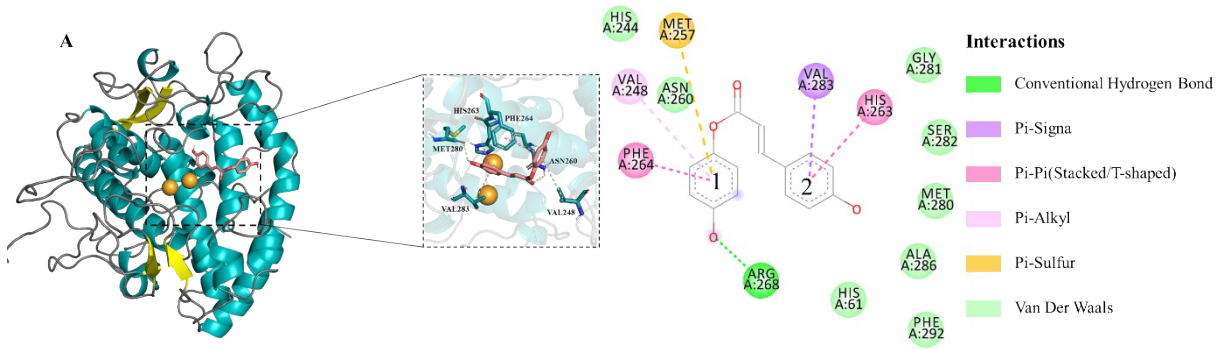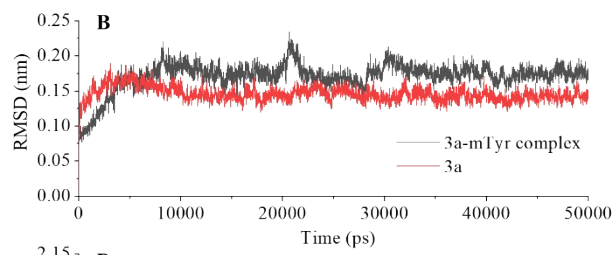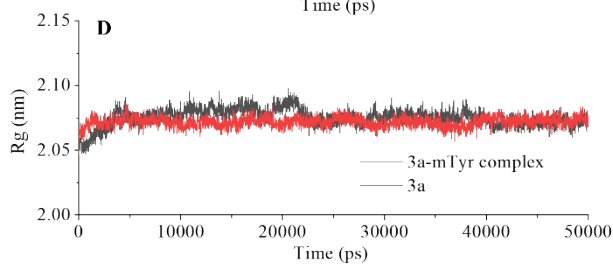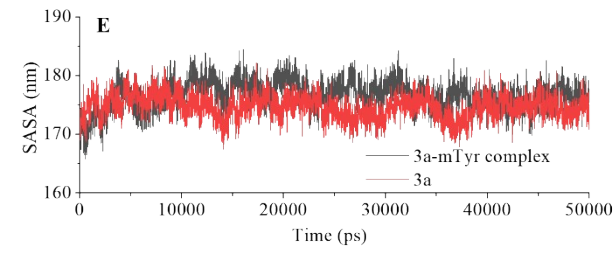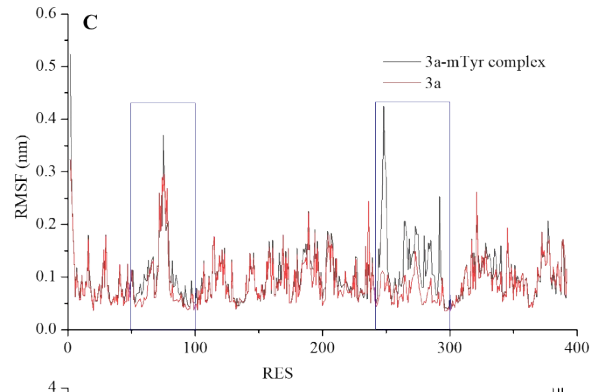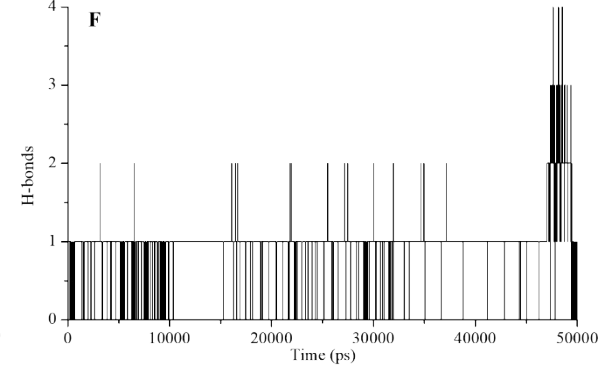

Compound 3a

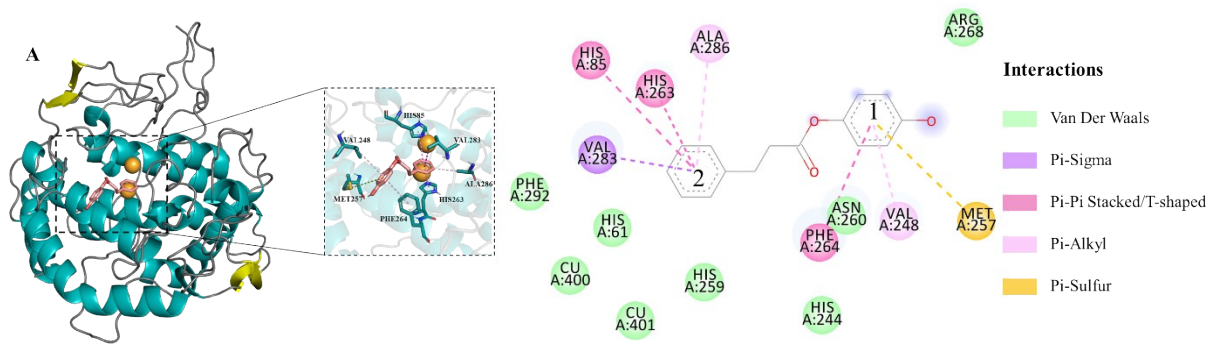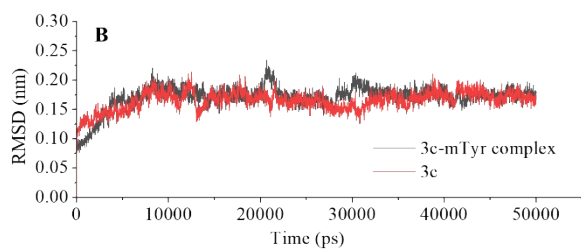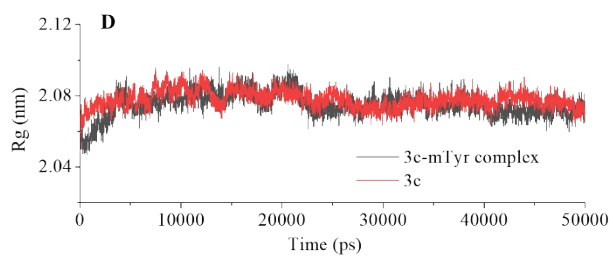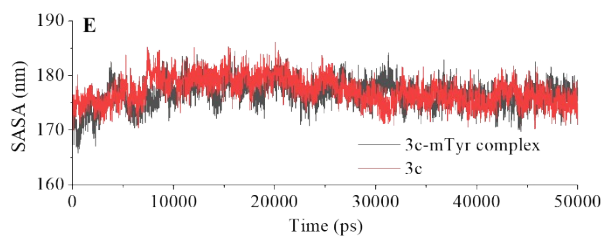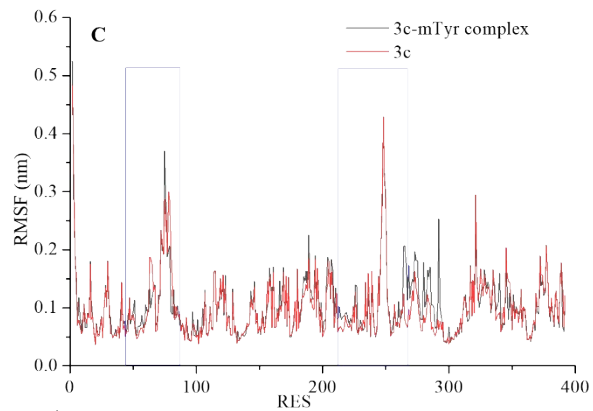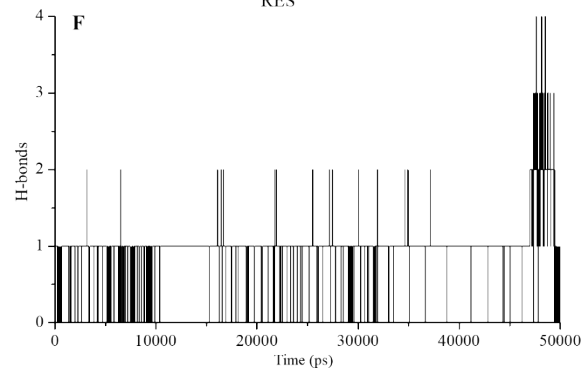

Compound 3c

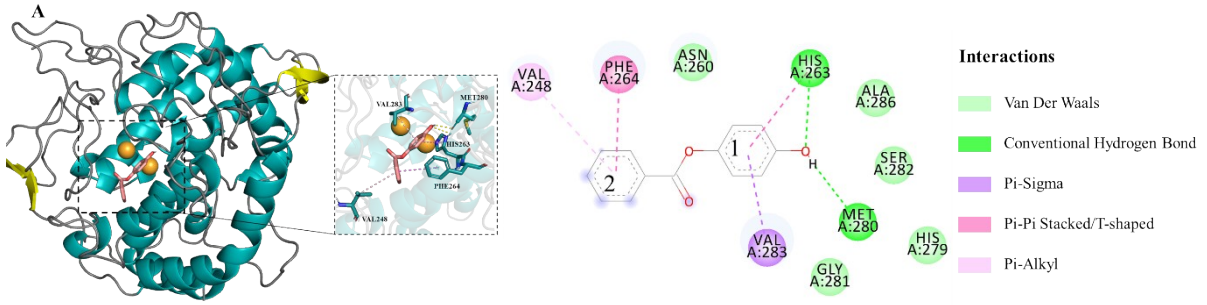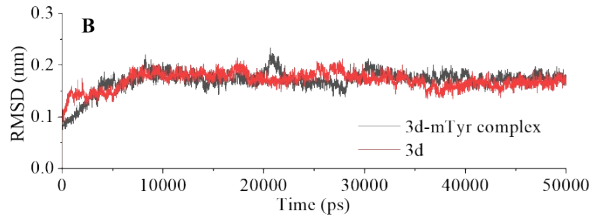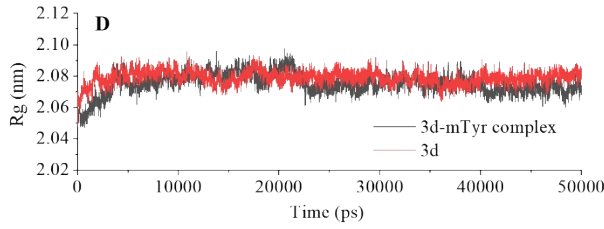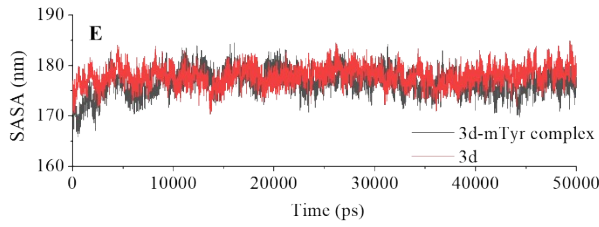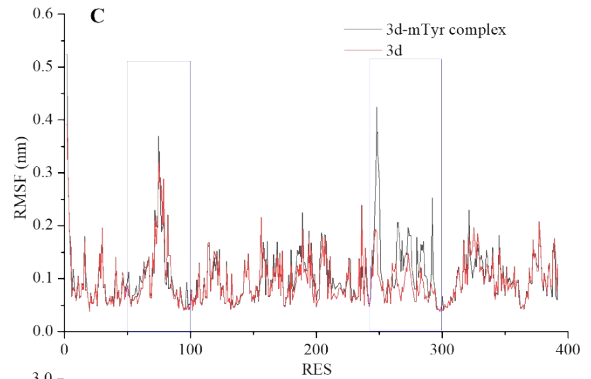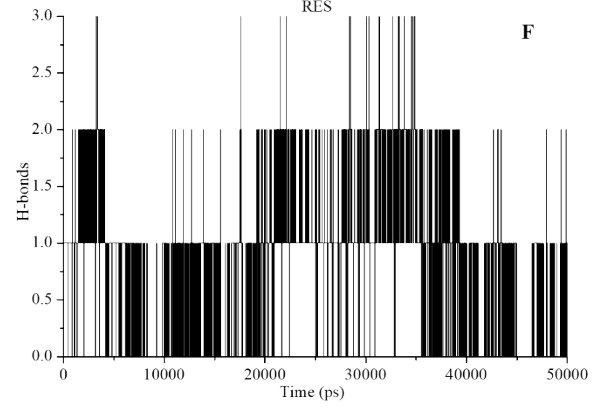

Compound 3d

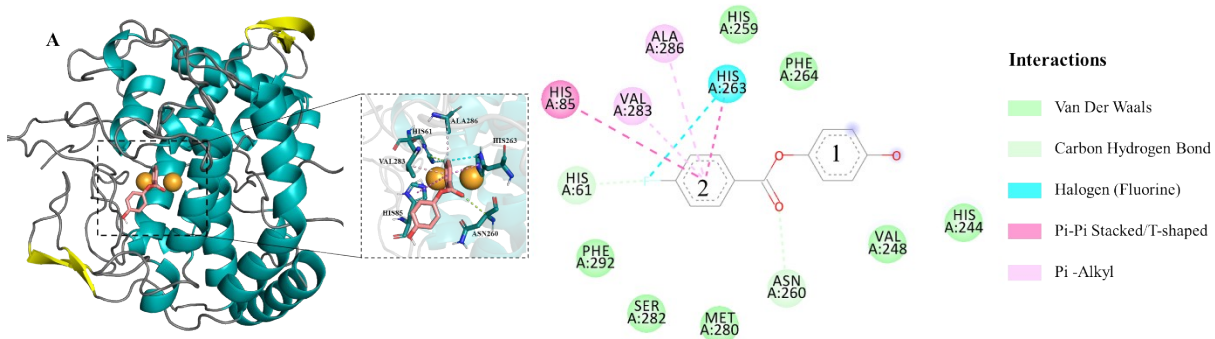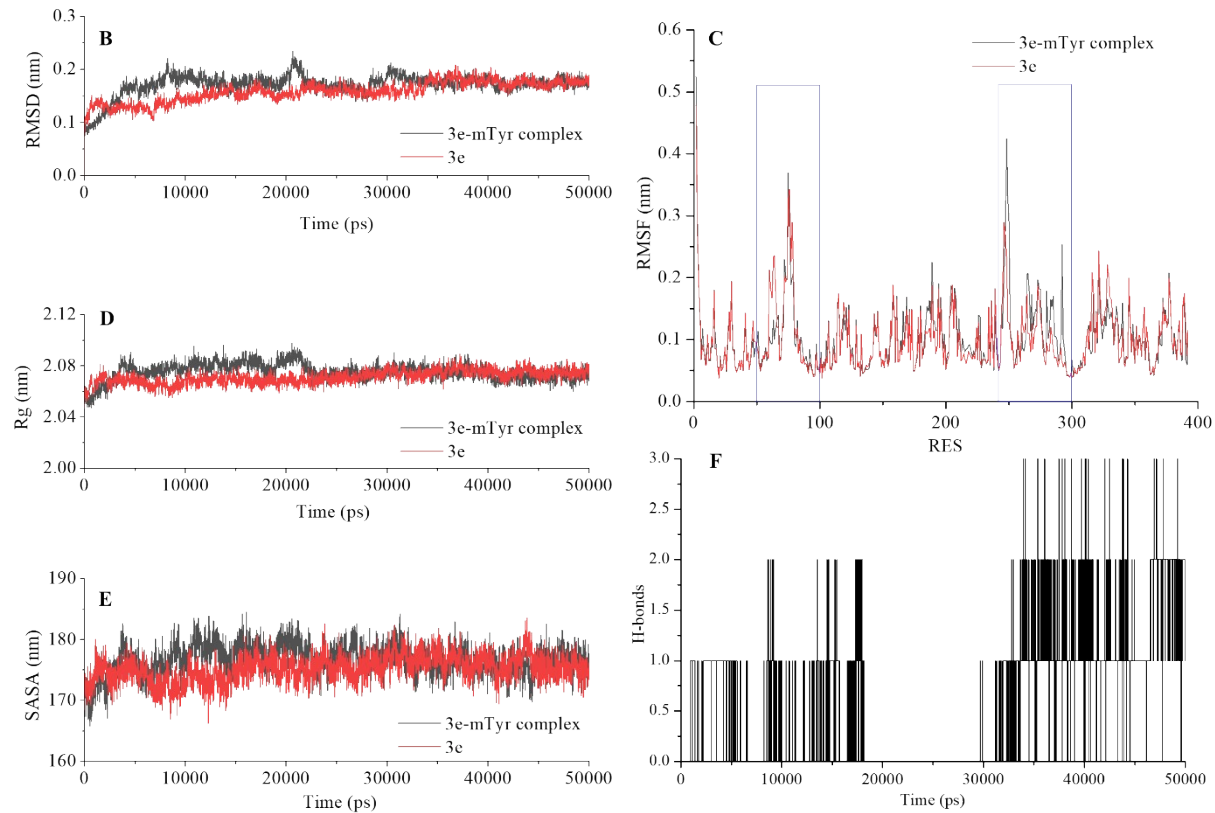

Compound 3e

Figure S7. Docking model for compound 3a, 3c-3e with mTyrosinase (A) and Molecular dynamics results of compound 3a, 3c-3e and (3a, 3c-3e) -mTyrosinase complex with: B. RMSD, C. RMSF, D. Rg, E. SASA, and F. H-bonds

Table S1. Linear fitting equation, Michaelis constant ( $K_m$ ), maximum reaction rate ( $V_m$ ), and inhibition type for mTyr at varying concentrations of compounds 3a-3e

| Compound | Concentration ( $\mu\text{M}$ ) | Linear fitting equation | $R^2$  | $K_m$ ( $\mu\text{M}$ ) | $V_m$ ( $\times 10^3, \text{min}^{-1}$ ) | Inhibition type    |
|----------|---------------------------------|-------------------------|--------|-------------------------|------------------------------------------|--------------------|
| 3a       | 0                               | $Y=1000.25+1287.41X$    | 0.9991 | 1.2871                  | 0.9998                                   | Noncompetitive     |
|          | 5                               | $Y=2340.91+3012.40X$    | 0.9958 | 1.2870                  | 0.4272                                   |                    |
|          | 10                              | $Y=3516.19+4525.44X$    | 0.9963 | 1.2867                  | 0.2843                                   |                    |
|          | 20                              | $Y=5446.87+7064.94X$    | 0.9965 | 1.2869                  | 0.1836                                   |                    |
|          | 0                               | $Y=333.72+1645.85X$     | 0.9902 | 4.9318                  | 2.9965                                   |                    |
| 3b       | 1                               | $Y=1320.62+2456.41X$    | 0.9949 | 2.6173                  | 0.7572                                   | Mix-noncompetitive |
|          | 2                               | $Y=2889.49+3833.45X$    | 0.9964 | 1.3267                  | 0.3461                                   |                    |
|          | 4                               | $Y=4662.26+5183.79X$    | 0.9982 | 1.1119                  | 0.2145                                   |                    |
|          | 0                               | $Y=1000.25+1287.41X$    | 0.9991 | 1.2871                  | 0.9998                                   |                    |
| 3c       | 5                               | $Y=1580.45+2034.21X$    | 0.9990 | 1.2870                  | 0.6327                                   | Noncompetitive     |
|          | 10                              | $Y=2920.18+3759.70X$    | 0.9991 | 1.2873                  | 0.3424                                   |                    |
|          | 20                              | $Y=3875.12+4950.54X$    | 0.9999 | 1.2774                  | 0.2581                                   |                    |
|          | 0                               | $Y=1084.97+1272.89X$    | 0.9961 | 1.1732                  | 0.9217                                   |                    |
| 3d       | 5                               | $Y=1085.12+1776.46X$    | 0.9985 | 1.6371                  | 0.9216                                   | Competitive        |
|          | 10                              | $Y=1086.06+2324.89X$    | 0.9996 | 2.1407                  | 0.9208                                   |                    |
|          | 20                              | $Y=1085.95+2900.15X$    | 0.9967 | 2.6706                  | 0.9209                                   |                    |
|          | 0                               | $Y=679.35+1370.31X$     | 0.9904 | 2.0171                  | 1.472                                    |                    |
| 3e       | 5                               | $Y=678.55+1736.97X$     | 0.9943 | 2.5598                  | 1.474                                    | Competitive        |
|          | 10                              | $Y=680.49+2419.72X$     | 0.9983 | 3.5558                  | 1.470                                    |                    |
|          | 20                              | $Y=681.12+3431.14X$     | 0.9983 | 5.0375                  | 1.468                                    |                    |
|          | 0                               | $Y=679.35+1370.31X$     | 0.9904 | 2.0171                  | 1.472                                    |                    |

Table S2 Docking energy and bonding condition of compounds 3a-3e with mTyr

| Compounds | Docking energy (kcal·mol <sup>-1</sup> ) | Bonding condition                                                                                     |                                                                                                                                                                                                           |                           |                                          |
|-----------|------------------------------------------|-------------------------------------------------------------------------------------------------------|-----------------------------------------------------------------------------------------------------------------------------------------------------------------------------------------------------------|---------------------------|------------------------------------------|
|           |                                          | Hydrogen Bonds                                                                                        | Hydrophobic                                                                                                                                                                                               | Miscellaneous (Pi-Sulfur) | Halogen (Fluorine)                       |
| 3a        | -7.6                                     | Ph1O←Arg 268 (6.66 Å, Conventional Hydrogen Bond)                                                     | Ph1←Phe264 (6.68Å, Pi-Pi Stacked/T-shaped);<br>Ph1←Val248 (5.16Å, Pi-alkyl);<br>Ph2←His263 (5.57Å, Pi-Pi Stacked/T-shaped);<br>Ph2←Val283 (5.11Å, Pi-Sigma).                                              | Ph1←Met257 (6.50 Å)       |                                          |
| 3b        | -7.2                                     | Ph1OH←Met280(5.01 Å, Conventional Hydrogen Bond)                                                      | Ph1←His263 (5.32Å, Pi-Pi Stacked);<br>Ph1←Val283 (4.89Å, Pi-Sigma);<br>Ph2←Val248 (5.31 Å, Pi-Sigma).                                                                                                     | Ph2←Met257 (6.57 Å)       |                                          |
| 3c        | -6.7                                     |                                                                                                       | Ph1←Val248 (5.57Å, Pi-Alkyl);<br>Ph1←Phe264 (6.74Å, Pi-Pi Stacked/T-shaped);<br>Ph2←Val283 (4.26Å, Pi-Sigma);<br>Ph2←His85/His263 (5.47/5.48Å, Pi-Pi Stacked/T-shaped);<br>Ph2←Ala 286 (6.53Å, Pi-Alkyl). | Ph1←Met257(7.58 Å)        |                                          |
| 3d        | -7.0                                     | Ph1OH←Met280(4.88 Å, Conventional Hydrogen Bond);<br>Ph1O←His263 (4.06 Å, Conventional Hydrogen Bond) | Ph1←His 263 (5.52Å, Pi-Pi Stacked/T-shaped);<br>Ph1←Val283 (4.82Å, Pi-Sigma);<br>Ph2←Val248 (6.29Å, Pi-Alkyl);<br>Ph2←Phe264 (6.62Å, Pi-Pi Stacked/T-shaped).                                             |                           |                                          |
| 3e        | -6.7                                     | Ph2F←His61 (5.50 Å, Carbon Hydrogen Bond)                                                             | Ph2←Val283 (4.42Å, Pi-Sigma);<br>Ph2←Val283/Ala286 (4.63/6.95Å, Pi-Alkyl);<br>Ph2←His85/His263 (7.42/4.57Å, Pi-Pi Stacked/T-shaped).                                                                      |                           | Ph2F←His 263 (5.41 Å Halogen (Fluorine)) |
